# Supplementary material for: Development and evaluation of a system of proxy data assimilation for paleoclimate reconstruction
Source: Copernicus journal article supplement (doi:10.5194/cp-2016-121), 2016-11-22
Supplement: Supplementary file 1 [file okazaki_2016_cp_append.xlsx]

## Sheet: Reference list
Site	Archive type	Lat (°N)	Lon (°E)	Reference
Abrolhos	coral	-28.5	113.8	Kuhnert H, Patzold J, Hatcher B, Wyrwoll K-H, Eisenhauer A, Collins LB, Zhu ZR, Wefer G (1999): A 200-year coralstable oxygen isotope record from a high-latitude reef off Western Australia.Coral Reefs, 18: 1-12
Ifaty	coral	-23.1	43.6	Zinke, J., W.-C. Dullo, G.A. Heiss, and A. Eisenhauer. 2004. ENSO and Indian Ocean subtropical dipole variability is recorded in a coral record off southwest Madagascar for the period 1659 to 1995. Earth and Planetary Science Letters 228 (1-2): 177-194
Amedee	coral	-22.5	166.5	Quinn, T.M., T.J. Crowley, F.W. Taylor, C. Henin, P. Joannot, and Y. Join, 1998, A multicentury stable isotope record from a New Caledonia coral: Interannual and decadal SST variability in the southwest Pacific since 1657; Paleoceanography, 13, 4, 412-426
Abraham	coral	-22.1	153	Druffel, E.R.M. and S. Griffin, 1993, Large Variations of Surface Ocean Radiocarbon: Evidence of Circulation Changes in the Southwestern pacific, Journal of Geophysical Research v.98, no c11, pp 20246-20259.
Ningaloo	coral	-21.9	114	Kuhnert, H., Patzold, J., Wyrwoll, K.-H., Wefer, G., Monitoring climate variability over the past 116 years in coral oxygen isotopes from Ningaloo Reef, Western Australia, Int. J. Earth Sci., 88, 725-732, 2000.
Rarotonga	coral	-21.2	-159.8	Linsley, B. K., A. Kaplan, Y. Gouriou, J. Salinger, P. B. deMenocal, G. M. Wellington, and S. S. Howe (2006), Tracking the extent of the South Pacific Convergence Zone since the early 1600s, Geochem. Geophys. Geosyst., 7, Q05003, doi:10.1029/2005GC001115.
La Reunion	coral	-21	55.3	Pfeiffer, M., O. Timm, W.-C. Dullo, and S. Podlech (2004), Oceanic forcing of interannual and multidecadal climate variability in the southwestern Indian Ocean: Evidence from a 160 year coral isotopic record (La Réunion, 55°E, 21°S), Paleoceanography, 19, PA4006, doi:10.1029/2003PA000964.
Moorea	coral	-17.5	-149.8	Boiseau, M., M. Ghil, and A. Juillet-Leclerc, 1999, Climatic trends and interdecadal variability from South-Central Pacific coral records, Geophys. Res. Let., v. 26, No.18, pp. 2881-2884, September 15, 1999.
Mayotte	coral	-12.7	45.1	Zinke, J., M. Pfeiffer, O. Timm, W.-C. Dullo, D. Kroon, and B. A. Thomassin (2008), Mayotte coral reveals hydrological changes in the western Indian Ocean between 1881 and 1994, Geophys. Res. Lett., 35, L23707, doi:10.1029/2008GL035634.; Zinke, J., Pfeiffer, M., Timm, O., Dullo, W.-Ch., Brummer, G. J. A., Western Indian Ocean marine and terrestrial record of climate variability: a review and new …
Misima	coral	-10.7	152.8	Hereid, K. A., Quinn, T. M., Taylor, F. W., Shen, C.-C., Edwards, R. L., and Cheng, H., Coral record of reduced El Nino activity in the earth 15th to middle 17th centuries, Geology, 41, 51-54, 2012.
Alphonse Atoll	coral	-7	52.8	Levy Oren , Rosenfeld Michael , Yam Ruth , Shemesh Aldo , (2006), Heterogeneity of coral skeletons isotopic compositions during the 1998 bleaching event, Limnology and Oceanography, 51, doi: 10.4319/lo.2006.51.2.1142.
Chagos	coral	-5.4	71.8	Pfeiffer, M., W.-C. Dullo, and A. Eisenhauer. 2004. Variability of the Intertropical convergence Zone recorded in coral isotopic records from the central Indian Ocean (Chagos Archipelago). Quaternary Research 61: 245-255
Mahe	coral	-4.6	55	Charles, C. D., Hunter, D. E., Fiarbanks, R. G., Interaction between the ENSO and the Asian monsoon in a coral record of tropical climate, Science, 277, 925-928, 1997.
Punta pitt	coral	-0.7	-89.2	Shen, G. T., J. E. Cole, D. W. Lea, L. J. Linn, T. A. McConnaughey, and R.G. Fairbanks, Surface ocean variability at Galapagos from 1936-1982:Calibration of geochemical tracers in corals, Paleoceanography,7,563-588, 1992a
Nauru	coral	-0.5	166	Guilderson, T. P., and D. P. Schrag (1999), Reliability of coral isotope records from the Western Pacific Warm Pool: A comparison using age-optimized records, Paleoceanography, 14(4), 457–464, doi:10.1029/1999PA900024.
Urvina	coral	-0.4	-91.2	Dunbar, R.B. Wellington, G.M., Colgan, M.W., and Glynn, P.W., 1994, Eastern Pacific Sea Surface Temperature since 1600 A.D.: The d18O Record of Climate Variability in Galapagos Corals, Paleoceanography, v.9, 291-315.; Druffel, E.R.M., Griffin, S., Glynn, D., Dunber, R. B., Mucciarone, D. A., Toggweiler, J. R., Seasonal radiocarbon and oxygen isotopes in a Galapogos coral: Calibration with climate…
Saotome	coral	0.5	6.6	Swart, P. K., K. S. White, D. Enfield, R. E. Dodge, and P. Milne (1998), Stable oxygen isotopic composition of corals from the Gulf of Guinea as indicators of periods of extreme precipitation conditions in the sub-Sahara, J. Geophys. Res., 103(C12), 27885–27891, doi:10.1029/98JC02404.
Maiana	coral	1	173	Urban, F.E., J. E. Cole, and J.T. Overpeck, 2000, Influence of mean climate change on climate variability from a 155-year tropical Pacific coral record. Nature 407, 989-993
Tarawa	coral	1	172	Cole, J. E., Fairbanks, R. G., Shen, G. T., Recent variability in the Southern Oscillation: isotopic results from a Tarawa atoll coral, Science, 260, 1790-1793, 1993.
Kiritimati	coral	2	-157.3	Evans, M.N., R.G. Fairbanks and J.L. Rubenstone, A Proxy Index of ENSO Teleconnections, Nature 394:732-733, 1998.; Cobb, K.M., D.E. Hunter, and C.D. Charles. 2001. A central tropical Pacific coral demonstrates Pacific, Indian, and Atlantic decadal climate connections. Geophysical Research Letters, 28(11), 2209-2212.; Cobb, K. M., Westphal, N., Sayani, H. R., Watson, J. T., Lorenzo, E. D., Cheng, …
Fanning	coral	3.85	-159.35	Cobb, K.M., D.E. Hunter, and C.D. Charles. 2001. A central tropical Pacific coral demonstrates Pacific, Indian, and Atlantic decadal climate connections. Geophysical Research Letters, 28(11), 2209-2212.
Palmyra	coral	5.9	-162.1	Cobb, K.M., C.D. Charles, H. Cheng & R.L. Edwards, 2003, El Nino-Southern Oscillation and tropical Pacific climate during the last millennium. Nature, Vol. 424, No. 6946, pp. 271 - 276
Palau	coral	7.4	134.4	Osborne, M. C., Dunbar, R. B., Mucciarone, D. A., Sanchez-Cabeza, J.-A., Druffel, E., Regional calibration of coral-based climate reconstructions from Palau, West Pacific Warm Pool (WPAP), Palaeogeogr. Palaeocl., 386, 308-320, 2013.; Osborne, M. C., Dunbar, R. B., Mucciarone, D. A., Druffel, E., Sanchez-Cabeza, J.-A., A 215-yr coral d18O time series from Palau records dynamics of the West Pacific…
Secas	coral	8	-82.5	Linsley, B. K., R. B. Dunbar, G. M. Wellington, and D. A. Mucciarone (1994), A coral-based reconstruction of Intertropical Convergence Zone variability over Central America since 1707, J. Geophys. Res., 99(C5), 9977–9994, doi:10.1029/94JC00360.
Clipperton	coral	10.3	-109.2	Linsley, B. K., L. Ren, R. B. Dunbar, and S. S. Howe (2000), El Niño Southern Oscillation (ENSO) and decadal-scale climate variability at 10°N in the eastern Pacific from 1893 to 1994: A coral-based reconstruction from Clipperton Atoll, Paleoceanography, 15(3), 322–335, doi:10.1029/1999PA000428.; Wu, H. C., Moreau, M., Linsley, B. K., Schrag, D. P., Correge, T., Investigation of sea surface tempe…
Buccoo	coral	11.1667	-60.85	Moses, C.S. and P.K. Swart. 2006. Stable isotope and growth records in corals from the island of Tobago: Not simply a record of the Orinoco. Proceedings of the 10th International Coral Reef Symposium (Okinawa):580-587
Andaman	coral	11.5	92.7	Rixen, T., Ramachandran, P., Lehnhoff, L., Dasbach, D., Gaye, B., Urban B., Ramachandran, R., Ittekkot, V., Impact of monsoon-driven surface ocean processes on a coral off Port Blair on the Andaman Islands and their link to North Atlantic climate variations, Global Planet Change, 75(1-2), 1-13, 2011.
Losroques	coral	11.77	-66.75	Hetzinger, S., Pfeiffer, M., Dullo, W.-C., Keenlyside, N., Latif, M., and Zinke, J., Caribbean coral tracks Atlantic Multidecadal Oscillatin and past hurricane activity, 36(1), 11-14, 2008.
Guam	coral	13.6	144.8	Asami, R., T. Yamada, Y. Iryu, C.P. Meyer, T.M. Quinn, and G. Paulay. 2004.Carbon and oxygen isotopic composition of a Guam coral and their elationships to environmental variables in the western Pacific. Palaeogeography, Palaeoclimatology, Palaeoecology 212:1-22
Guadaloupe	coral	16.2	-61.5	Hetzinger, S., M. Pfeiffer, W.-C. Dullo, E. Ruprecht, and D. Garbe-Schönberg (2006), Sr/Ca and δ18O in a fast-growing Diploria strigosa coral: Evaluation of a new climate archive for the tropical Atlantic, Geochem. Geophys. Geosyst., 7, Q10002, doi:10.1029/2006GC001347.
Pedra de Lume	coral	16.8	-22.9	Moses, C. S., P. K. Swart, and B. E. Rosenheim (2006), Evidence of multidecadal salinity variability in the eastern tropical North Atlantic, Paleoceanography, 21, PA3010, doi:10.1029/2005PA001257.
Ogasawara	coral	27.1	142.2	Felis, T., Suzuki, A., Kuhnert, H., Dima, M., Lohmann, G., and Kawahata, H., Subtropical coral reveals abrupt early-twentieth-century freshening in the western North Pacific Ocean, Geology, 37(6), 527-530, 2009.
Kikai	coral	28.3	129.9	Morimoto, M., Kitagawa, H., Shibata, Y., Kayanne, H., , 2004, Radiocarbon, 46(2), 643-648, 2004.
Bermuda	coral	32	-64	Goodkin, N. F., K. A. Hughen, W. B. Curry, S. C. Doney, and D. R. Ostermann (2008), Sea surface temperature and salinity variability at Bermuda during the end of the Little Ice Age, Paleoceanography, 23, PA3203, doi:10.1029/2007PA001532.
South Pole	ice core	-85.3	166.2	Mayewski, P.A. and M.R. Legrand, 1990, Recent increase in nitrate concentration of Antarctic snow, Nature, 346, 258-260.
Plateau Remote	ice core	-84	43	Cole-Dai, J., E. Mosley-Thompson, S. P. Wight, and L. G. Thompson (2000), A 4100-year record of explosive volcanism from an East Antarctica ice core, J. Geophys. Res., 105(D19), 24431–24441, doi:10.1029/2000JD900254.
WDC	ice core	-79.5	-112.1	Mitchell, L., E. Brook, T. Sowers, J. McConnell, K. Taylor (2011), Multidecadal variability of atmospheric methane, 1000-1800 C.E., J. Geophys. Res., 116, G02007,
ITASE 00-1	ice core	-79.4	-111.2	Schneider, D. P., Steig, E. J., van Ommen, T. D., Dixon, D. A., Mayewski, P. A., Jones, J. M., Bitz, C. M., Antarctic temperatures over the past two centuries from ice cores, Geophys. Res. Let., 33, 2006.
ITASE 01-2	ice core	-77.8	-102.9	Schneider, D. P., and Steig, E. J., Ice cores record significant 1940s Antarctic warmth related to tropical climate variability, 2008.
Erebus	ice core	-77.5	167.7	Rhodes, R. H., Bertler, N. A. N., Baker, J. A., Steen-Larsen, H. C., Sneed, S. B., Morgenstern, U., and Johnsen, S. J.: Little Ice Age climate and oceanic conditions of the Ross Sea, Antarctica from a coastal ice core record, Clim. Past, 8, 1223-1238, doi:10.5194/cp-8-1223-2012, 2012.
ITASE 01-5	ice core	-77.1	-89.1	Schneider, D. P., and Steig, E. J., Ice cores record significant 1940s Antarctic warmth related to tropical climate variability, 2008.
Siple	ice core	-75.92	-84.25	Schneider, D. P., Steig, E. J., van Ommen, T. D., Dixon, D. A., Mayewski, P. A., Jones, J. M., Bitz, C. M., Antarctic temperatures over the past two centuries from ice cores, Geophys. Res. Let., 33, 2006.
DML	ice core	-75	0	Graf, W., Oerter, H., Reinwarth, O., Stichler, W., Wilhelms, F., Miller, H., Mulvaney, R., Stable-isotope record from Dronning Maud Land, Antarctica, Ann. Glaciol., 35(1), 195-201, 2002.
Gomez	ice core	-73.6	-70.4	Thomas, E. R., P. F. Dennis, T. J. Bracegirdle, and C. Franzke (2009), Ice core evidence for significant 100-year regional warming on the Antarctic Peninsula, Geophys. Res. Lett., 36, L20704, doi:10.1029/2009GL040104.
DML	ice core	-70.9	11.5	Thamban, M., Chaturvedi, A. Rajakumar, A. Naik, S.S. D'Souza, W. Singh, A. Rajan, S. Ravindra, R. (2006). Aerosol perturbations related to volcanic eruptions during the past few centuries as recorded in an ice core from the Central Dronning Maud Land, Antarctica. Current Science, vol. 91, no9, pp. 1200-1207.
Law Dome	ice core	-66.8	112.8	Pedro, J. B., McConnell, J. R., van Ommen, T. D., Fink, D., Curran, M. A. J., Smith, A. M., Simon, K. J., Moy, A. D., and Das, S. B., Solar and climate influences on ice core 10Be records from Antarctica and Greenland during the neutron monitor era, Earth Planet. Sc. Lett., 355-356, 174-186, 2012.; Schneider, D. P., E. J. Steig, T. D. van Ommen, D. A. Dixon, P. A. Mayewski, J. M. Jones, and C. M.…
Quelccaya	ice core	-13.9	-70.8	Thompson, L. G., Mosley-Thompson, E., Davis, M. E., Zagorodnov, V. S., Howat, I. M., Mikhalenko, V. N., and Lin, P.-N., Annually resolved ice core records of tropical climate variability over the past ~1800 Years, Science, 2013.
Huascaran	ice core	-9	-77.5	Thompson, L. G., Mosley-Thompson, E., Davis, M. E., Lin, P.-N., Henderson, K. A., Cole-Dai, J., Bolzan, J. F., and Liu, K.-b., Late glacial stage and holocene tropical ice core records from Huascaran, Peru, Science, 269, 5220, 46-50, 1995.
Rongbuk	ice core	28	87	Ming, J., Cachier, H., Xiao, C., Qin, D., Kang, S., Hou, S., and Xu, J.: Black carbon record based on a shallow Himalayan ice core and its climatic implications, Atmos. Chem. Phys., 8, 1343-1352, doi:10.5194/acp-8-1343-2008, 2008.; Shugui, H., Dahe, Q., Dongqi, Z., Shichang, K., Mayewski, P. A., Wake, C. P., A 154 a high-resolution ammonium record from the Rongbuk glacier, north slope of Mt. Qomo…
Dasuopu	ice core	28.4	85.7	Thompson, L. G., Yao, T., Mosley-Thompson, E., Davis, M. E., Henderson, K. A., and Lin, P.-N., A high-resolution millennial records of the South Asian monsoon from Himalayan ice cores, Science, 289, 6486, 1916-1919, 2000.
Galadaindong	ice core	33.6	91.2	ShiChang, K., YougJun, Z., DaHe, Q., JiaWen, R., QuangGong, Z., Grigholm, B., and Mayewski, P. A., Recent temperature increase recorded in an ice core in the source region of Yangtze River, 52, 6, 825-831, 2007.
Dunde	ice core	38.1	96.4	Takeuchi, N., Miyake, T., Nakazawa, F., Narita, H., Fujita, K., Sakai, A., Nakawo, M., Fujii, Y., Duan, K., and Yao, T., A shallow ice core re-drilled on the Dunde ice cap, western China: recent changes in the Asian high mountains, Environ. Res. Lett., 4, 045207, 2009.
Muztagata	ice core	38.3	75.1	Tian, L., T. Yao, Z. Li, K. MacClune, G. Wu, B. Xu, Y. Li, A. Lu, and Y. Shen (2006), Recent rapid warming trend revealed from the isotopic record in Muztagata ice core, eastern Pamirs, J. Geophys. Res., 111, D13103, doi:10.1029/2005JD006249.
Gregoriev	ice core	42	77.9	Takeuchi, N., Fujita, K., Aizen, V. B., Narama, C., Yokoyama, Y., Okamoto, S., Naoki, K., Kubota, J., The disappearance of glaciers in the Tien Shan Mountains in Central Asia at the end of Pleistocene, Quaternary Sci. Rev., 103, 26-33, 2014.
Blukha	ice core	49.8	86.6	Okamoto, S., K. Fujita, H. Narita, J. Uetake, N. Takeuchi, T. Miyake, F. Nakazawa, V. B. Aizen, S. A. Nikitin, and M. Nakawo (2011), Reevaluation of the reconstruction of summer temperatures from melt features in Belukha ice cores, Siberian Altai, J. Geophys. Res., 116, D02110, doi:10.1029/2010JD013977.
Eclipse	ice core	60.5	-139.5	Yalcin, K., C. P. Wake, and M. Germani, A 100-year record of North Pacific volcanism in an ice core from Eclipse Icefield, Yukon Territory, Canada, J. Geophys. Res., 108(D1), 4012, doi:10.1029/2002JD002449, 2003.
Mt.Logan	ice core	60.6	-140.5	Moore, G. W. K., Holdsworth, G., and Alverson, K., Climate changes in the North Pacific region overt the past three centuries, Nature, 420, 401-403, 2002.
DYE-3 79	ice core	65.2	-43.8	B.M. Vinther, P.D. Jones, K.R. Briffa, H.B. Clausen, K.K. Andersen, D. Dahl-Jensen, S.J. Johnsen, Climatic signals in multiple highy resolved stable isotope records from Greenland, Quaternary Sci. Rev., 29, 3-4, 522-538, 2010.
DYE-2	ice core	66.5	-46.3	Langway, C.C., Jr., H. Oeschger, and W. Dansgaard (eds.), 1985. Greenland ice core: Geophysics, geochemistry and environment: Geophysical Monographs, v. 33, American Geophysics Union, Washington D.C.
Das2	ice core	67.5	-36.1	Pedro, J. B., McConnell, J. R., van Ommen, T. D., Fink, D., Curran, M. A. J., Smith, A. M., Simon, K. J., Moy, A. D., and Das, S. B., Solar and climate influences on ice core 10Be records from Antarctica and Greenland during the neutron monitor era, Earth
Milcent	ice core	70.3	-44.6	Dansgaard, W., Johnsen, S. J., Reeh, N., Gundestrup, N., Clausen, H. B., and Hammer, C. U., Climatic changes, Norsemen and modern man, Nature, 255, 24-28, 1975.
site A	ice core	70.6349	-35.82	H .B. Clausen, N.S. Gundestrup, S.J. Johnsen, R. Bindschadler, and J. Zwalley, 1988, Glaciological Investigations in the Crete area, central Greenland: A search for a new deep-drilling site. Annals of Glaciology, 10: 10-15
site D	ice core	70.6398	-39.6178	H .B. Clausen, N.S. Gundestrup, S.J. Johnsen, R. Bindschadler, and J. Zwalley, 1988, Glaciological Investigations in the Crete area, central Greenland: A search for a new deep-drilling site. Annals of Glaciology, 10: 10-15
site B	ice core	70.6508	-37.4788	H .B. Clausen, N.S. Gundestrup, S.J. Johnsen, R. Bindschadler, and J. Zwalley, 1988, Glaciological Investigations in the Crete area, central Greenland: A search for a new deep-drilling site. Annals of Glaciology, 10: 10-15
site C	ice core	70.677	-38.787	H .B. Clausen, N.S. Gundestrup, S.J. Johnsen, R. Bindschadler, and J. Zwalley, 1988, Glaciological Investigations in the Crete area, central Greenland: A search for a new deep-drilling site. Annals of Glaciology, 10: 10-15
site H	ice core	70.8651	-35.8381	H .B. Clausen, N.S. Gundestrup, S.J. Johnsen, R. Bindschadler, and J. Zwalley, 1988, Glaciological Investigations in the Crete area, central Greenland: A search for a new deep-drilling site. Annals of Glaciology, 10: 10-15
Crete	ice core	71.1204	-37.3164	H .B. Clausen, N.S. Gundestrup, S.J. Johnsen, R. Bindschadler, and J. Zwalley, 1988, Glaciological Investigations in the Crete area, central Greenland: A search for a new deep-drilling site. Annals of Glaciology, 10: 10-15
site G	ice core	71.1549	-35.8377	H .B. Clausen, N.S. Gundestrup, S.J. Johnsen, R. Bindschadler, and J. Zwalley, 1988, Glaciological Investigations in the Crete area, central Greenland: A search for a new deep-drilling site. Annals of Glaciology, 10: 10-15
Summit	ice core	71.3	-37.9	Langway, C.C., Jr., H. Oeschger, and W. Dansgaard (eds.), 1985. Greenland ice core: Geophysics, geochemistry and environment: Geophysical Monographs, v. 33, American Geophysics Union, Washington D.C.
site F	ice core	71.492	-35.8812	H .B. Clausen, N.S. Gundestrup, S.J. Johnsen, R. Bindschadler, and J. Zwalley, 1988, Glaciological Investigations in the Crete area, central Greenland: A search for a new deep-drilling site. Annals of Glaciology, 10: 10-15
site E	ice core	71.7593	-35.8505	H .B. Clausen, N.S. Gundestrup, S.J. Johnsen, R. Bindschadler, and J. Zwalley, 1988, Glaciological Investigations in the Crete area, central Greenland: A search for a new deep-drilling site. Annals of Glaciology, 10: 10-15
GISP2	ice core	72.1	-38.1	Grootes, P. M., and M. Stuiver (1997), Oxygen 18/16 variability in Greenland snow and ice with 10−3- to 105-year time resolution, J. Geophys. Res., 102(C12), 26455–26470, doi:10.1029/97JC00880.
GRIP 89-2	ice core	72.6	-37.6	B.M. Vinther, P.D. Jones, K.R. Briffa, H.B. Clausen, K.K. Andersen, D. Dahl-Jensen, S.J. Johnsen, Climatic signals in multiple highy resolved stable isotope records from Greenland, Quaternary Sci. Rev., 29, 3-4, 522-538, 2010.
B16	ice core	73.9	-37.6	Schwager, Matthias (2000): Eisbohrkernuntersuchungen zur räumlichen und zeitlichen Variabilität von Temperatur und Niederschlagsrate im Spätholozän in Nordgrönland (Ice core analysis on the spatial and temporal variability of temperature and precipitation during the late Holocene in North Greenland). Berichte zur Polarforschung = Reports on Polar Research, 362, 136 pp, doi:10.2312/BzP_0362_2000
Devon	ice core	75	-89	Fisher, D.A., R.M. Koerner, W.S.B. Paterson, W. Dansgaard, N. Gundestrup, and N. Reeh, 1983: Effect of wind scouring on climatic records from icecore oxygen isotope profiles. Nature, 301:205-209
NGRIP	ice core	75.1	-42.3	Vinther, B. M., et al. (2006), A synchronized dating of three Greenland ice cores throughout the Holocene, J. Geophys. Res., 111, D13102, doi:10.1029/2005JD006921.
B18	ice core	76.6	-36.4	Schwager, Matthias (2000): Eisbohrkernuntersuchungen zur räumlichen und zeitlichen Variabilität von Temperatur und Niederschlagsrate im Spätholozän in Nordgrönland (Ice core analysis on the spatial and temporal variability of temperature and precipitation during the late Holocene in North Greenland). Berichte zur Polarforschung = Reports on Polar Research, 362, 136 pp, doi:10.2312/BzP_0362_2000
CampCentury	ice core	77.2	-61.1	Dansgaard, W., Johnsen, S. J., Moller, J., Langway, C. C. Jr., One thousand centuries of climatic record from Camp Century on the Greenland ice sheet, Science, 166, 3903, 377-380, 1969.
B26	ice core	77.3	-49.2	Kinnard, C., Zdanowics, C. M., Fisher, D. A., Isaksson, E., de Vernal, A., and Thompson, L. G., Nature, 479, 509-512, 2011.
Lomonosovfonna	ice core	78.9	17.4	ISAKSSON, E., DIVINE, D., KOHLER, J., MARTMA, T., POHJOLA, V., MOTOYAMA, H. and WATANABE, O. (2005), CLIMATE OSCILLATIONS AS RECORDED IN SVALBARD ICE CORE ω18O RECORDS BETWEEN AD 1200 AND 1997. Geografiska Annaler: Series A, Physical Geography, 87: 203–214. doi:10.1111/j.0435-3676.2005.00253.x
Austfonna	ice core	79.8	24	ISAKSSON, E., DIVINE, D., KOHLER, J., MARTMA, T., POHJOLA, V., MOTOYAMA, H. and WATANABE, O. (2005), CLIMATE OSCILLATIONS AS RECORDED IN SVALBARD ICE CORE ω18O RECORDS BETWEEN AD 1200 AND 1997. Geografiska Annaler: Series A, Physical Geography, 87: 203–214. doi:10.1111/j.0435-3676.2005.00253.x
B21	ice core	80	-41.1	Schwager, Matthias (2000): Eisbohrkernuntersuchungen zur r?umlichen und zeitlichen Variabilit?t von Temperatur und Niederschlags
Agassiz	ice core	80.7	-73.1	Fisher, D. A., R. M. Koerner and N. Reeh. 1995. Holocene Climatic Records from Agassiz Ice Cap, Ellesmere Island, NWT, Canada. The Holocene. Vol. 5, No. 1, pp. 19-24
Volcan Granada	tree-ring cellulose	-22	-66	Ballantyne, A. P., Baker, P. A., Chambers, J. Q. C., Villalba, R., Regional differenes in South American monsoon precipitation inferred from the growth and isotopic composition of tropical trees, Earth Interact., 15(5), 2011.
Puerto Maldonado	tree-ring cellulose	-12.6	-69.2	Ballantyne, A. P., Baker, P. A., Chambers, J. Q. C., Villalba, R., Regional differenes in South American monsoon precipitation inferred from the growth and isotopic composition of tropical trees, Earth Interact., 15(5), 2011.
Jag03	tree-ring cellulose	19.1	82.1	Managave, S. R., Sheshshayee, M. S., Ramesh, R., Borgaonkar, H. P., Shah, S. K., Bhattacharyya, A., Response of cellulose oxygen isotope values of teak trees in differing monsoon environments to monsoon rainfall, Dendrochronologia, 29(2), 89-97, 2011.
Jag04	tree-ring cellulose	19.1	82.3	Managave, S. R., Sheshshayee, M. S., Ramesh, R., Borgaonkar, H. P., Shah, S. K., Bhattacharyya, A., Response of cellulose oxygen isotope values of teak trees in differing monsoon environments to monsoon rainfall, Dendrochronologia, 29(2), 89-97, 2011.
Pai Wlidlife Sanctuary	tree-ring cellulose	19.3	98	Xu, C., Pumijumnong, N., Nakatsuka, T., Sano, M., Li, Z., A tre-ring cellulose d18O-based July-October precipitation reconstruction since AD 1826, northwest Thailand, J. Hydrol., 529(2), 433-441, 2015.
PL	tree-ring cellulose	20.3	103.9	Xu, C., M. Sano, and T. Nakatsuka (2011), Tree ring cellulose δ18O of Fokienia hodginsii in northern Laos: A promising proxy to reconstruct ENSO?, J. Geophys. Res., 116, D24109, doi:10.1029/2011JD016694.
MCC	tree-ring cellulose	21.7	104.1	Sano, M., C. Xu, and T. Nakatsuka (2012), A 300-year Vietnam hydroclimate and ENSO variability record reconstructed from tree ringδ18O, J. Geophys. Res., 117, D12115, doi:10.1029/2012JD017749.
Fujan	tree-ring cellulose	25.9	116.4	Xu, C., H. Zheng, T. Nakatsuka, and M. Sano (2013), Oxygen isotope signatures preserved in tree ring cellulose as a proxy for April–September precipitation in Fujian, the subtropical region of southeast China, J. Geophys. Res. Atmos., 118, 12,805–12,815, doi:10.1002/2013JD019803.
Wache	tree-ring cellulose	28	90	Sano, M., P. Tshering, J. Komori, K. Fujita, C. Xu, and T. Nakatsuka (2013), May–September precipitation in the Bhutan Himalaya since 1743 as reconstructed from tree ring cellulose δ18O, J. Geophys. Res. Atmos., 118, 8399–8410, doi:10.1002/jgrd.50664.
C.Nepal	tree-ring cellulose	28.2	85.2	Sano, M. (in prep)
Ranwu	tree-ring cellulose	29.4	96.5	Liu, X., Zheng, X., Leavitt, S. W., Wang, W., An, W., Xu, G., Sun, W., Wang, Y., Qin, D., Ren, J., A 400-year tree-ring d18O chronology for the southeastern Tibetan Plateau: Implications for inferring variations of the regional hydroclimate, Global Planetary Change, 104, 23-33, 2013.
Humla	tree-ring cellulose	29.9	81.9	Sano, M., Ramesh, R., Sheshshayee, M. S., Sukumar, R., Increasing aridity over the past 223 years in the Nepal Himalaya inferred from a tree-ring d18O chronology, Holocene, 22(7), 809-817, 2012.
Bomi	tree-ring cellulose	29.9	95.6	Shi, C., Daux, V., Zhang, Q.-B., Risi, C., Hou, S.-G., Stievenard, M., Pierre, M., Li, Z., and Masson-Delmotte, V.: Reconstruction of southeast Tibetan Plateau summer climate using tree ring δ18O: moisture variability over the past two centuries, Clim. Past, 8, 205-213, doi:10.5194/cp-8-205-2012, 2012.
Reting	tree-ring cellulose	30.3	91.5	Grießinger, J., A. Bräuning, G. Helle, A. Thomas, and G. Schleser (2011), Late Holocene Asian summer monsoon variability reflected by δ18O in tree-rings from Tibetan junipers, Geophys. Res. Lett., 38, L03701, doi:10.1029/2010GL045988.
Lhamcoka	tree-ring cellulose	31.8	99.1	Wernicke, J., Grießinger, J., Hochreuther, P., and Bräuning, A.: Variability of summer humidity during the past 800 years on the eastern Tibetan Plateau inferred from δ18O of tree-ring cellulose, Clim. Past, 11, 327-337, doi:10.5194/cp-11-327-2015, 2015.
Hongyuan	tree-ring cellulose	32	102.6	Xu, H., Hong, Y., Hong, B., Decreasing Asian summer monsoon intensity after 1860 AD in the global warming epoch, 39(7), 2079-2088, 2012.
Bagrot Valley	tree-ring cellulose	35.9	74.9	Treydte, K. S., Schleser, G. H., Helle, G., Frank, D. C., Winiger, M., Haug, G. H., and Esper, J., The twentieth century was the wettest period in northern Pakistan over the past millennium, Nature, 440, 1179-1182, 2006.
Boiber valley	tree-ring cellulose	36.6	75	Treydte, K. S., Schleser, G. H., Helle, G., Frank, D. C., Winiger, M., Haug, G. H., and Esper, J., The twentieth century was the wettest period in northern Pakistan over the past millennium, Nature, 440, 1179-1182, 2006.
Almagre	tree-ring cellulose	38.8	-105	Berkelhammer, M., and L. D. Stott (2012), Secular temperature trends for the southern Rocky Mountains over the last five centuries, Geophys. Res. Lett., 39, L17701, doi:10.1029/2012GL052447.
Petersham	tree-ring cellulose	42	-72	Evans, M. N., and Schrag, D. P., A stable isotpe-based approach to tropical dendroclimatology, Geochimica et Cosmochimica Acta, 68(16), 3295-3305, 2004.
Braconne	tree-ring cellulose	45.7	0.3	Labuhn, I., Daux, V., Pierre, M., Stievenard, M., Girardclos, O., Feron, A., Genty, D., Masson-Delmotte, V., Mestre, O., Tree age, site and climate controls on tree ring cellulose d18O: A cese stury on oak trees from south-western France, Dendrochronologia, 32(1), 78-89, 2014.
S.Swiss	tree-ring cellulose	46.4	8.7	Saurer, M., A. Kress, M. Leuenberger, K. T. Rinne, K. S. Treydte, and R. T. W. Siegwolf (2012), Influence of atmospheric circulation patterns on the oxygen isotope ratio of tree rings in the Alpine region, J. Geophys. Res., 117, D05118, doi:10.1029/2011JD016861.
Mapledurham	tree-ring cellulose	51.5	-1	Young, G. H. F., Joader, N. J., McCarroll, D., Bale, R. J., Demmler, J. C., Miles, D., Nayling, N. T., Rinne, K. T., Robertson, I., Watts, C., Whitney, M., Oxygen stable isotope ratios from British oak tree-rings provide a strong and consistent record of past changes in summer rainfall, Clim. Dynam., 45(11), 3609-3622, 2015.
Sandringham	tree-ring cellulose	52.8	0.5	Young, G. H. F., Joader, N. J., McCarroll, D., Bale, R. J., Demmler, J. C., Miles, D., Nayling, N. T., Rinne, K. T., Robertson, I., Watts, C., Whitney, M., Oxygen stable isotope ratios from British oak tree-rings provide a strong and consistent record of past changes in summer rainfall, Clim. Dynam., 45(11), 3609-3622, 2015.
HM1	tree-ring cellulose	54.3	-70.8	Begin, C., Gingras, M., Savard, M. M., Marion, J., Nicault, A., Begin, Y., Assessing tree-ring carbon and oxygen stable isotopes for climate reconstruction in the Canadian northeastern boreal forest, Palaeogeogr. Palaeocl., 423, 91-101, 2015.
Mackenzie	tree-ring cellulose	68.4	-133.8	Porter, T. J., Pisaric, M. F. J., Field, R. D., Kokelj, S. V., Edwards, T. W. D., DeMontigny, P., Healy, R., LeGrande, A. N., Spring-summer temperatures since AD 1780 reconstructed from stable oxygen isotope ratios in white spruce tree-rings from the Mackenzie Delta, northwestern Canada, Clim. Dynam., 42, 771-785, 2014.
