# Supplementary material for: Development and evaluation of a system of proxy data assimilation for paleoclimate reconstruction
Source: Copernicus journal article supplement (doi:10.5194/cp-2016-121), 2016-11-22
Supplement: Supplementary file [file cp-2016-121-AC3-supplement.pdf]

1  
2  
3  
4  
5  
6  
7  
8  
9  
10  
11  
12  
13  
14  
15  
16  
17  
18  
19  
20  
21  
22  
23  
24  
25

**Development and evaluation of a system of proxy data assimilation for  
paleoclimate reconstruction**

By

Atsushi Okazaki<sup>1</sup> and Kei Yoshimura<sup>2</sup>

<sup>1</sup>RIKEN Advanced Institute for Computational Science, Japan

<sup>2</sup>Institute of Industrial Science, The University of Tokyo, Japan

*Submitted to Climate of the Past*

*Submitted in November, 2016*

*Revised in February, 2017*

---

Corresponding author: Atsushi Okazaki, RIKEN Advanced Institute for Computational Science, 7-1-26 Minatojima-minami-machi, Chuo-ku, Kobe, Hyogo 650-0047, Japan (atsushi.okazaki@riken.jp)

26

## Abstract

27 Data assimilation (DA) has been successfully applied in the field of paleoclimatology  
28 to reconstruct past climate. However, data reconstructed from proxies have been  
29 assimilated, as opposed to the actual proxy values. This banned to fully utilize the  
30 information recorded in the proxies.

31 This study examined the feasibility of proxy DA for paleoclimate reconstruction.  
32 Isotopic proxies ( $\delta^{18}\text{O}$  in ice cores, corals, and tree-ring cellulose) were assimilated into  
33 models: an isotope enabled general circulation model (GCM) and forward proxy models,  
34 using offline data assimilation.

35 First, we examined the feasibility using an observation system simulation experiment  
36 (OSSE). The analysis showed a significant improvement compared with the first guess in  
37 the reproducibility of isotope ratios in the proxies, as well as the temperature and  
38 precipitation fields, when only the isotopic information was assimilated. The  
39 reconstruction skill for temperature and precipitation was especially high at low latitudes.  
40 This is due to the fact that isotopic proxies are strongly influenced by temperature and/or  
41 precipitation at low latitudes, which, in turn, are modulated by the El Niño-Southern  
42 Oscillation (ENSO) on interannual timescales.

43 Subsequently, the proxy DA was conducted with real proxy data. The reconstruction  
44 skill was decreased compared to the OSSE. In particular, the decrease was significant  
45 over the Indian Ocean, eastern Pacific, and the Atlantic Ocean where the reproducibility  
46 of the proxy model was lower. By changing the experimental design in a stepwise manner,  
47 the decreased skill was suggested to be attributable to the misrepresentation of the  
48 atmospheric and proxy models and/or the quality of the observations. Although there  
49 remains a lot to improve proxy DA, the result adequately showed that proxy DA is  
50 feasible enough to reconstruct past climate.

51

52 **1. Introduction**

53 Knowledge of past conditions is crucial for understanding long-term climate  
54 variability. Historically, two approaches have been used to reconstruct paleoclimate; one  
55 based on the empirical evidence contained in proxy data, and the other based on  
56 simulation with physically-based climate models. Recently, an alternative approach  
57 combining proxy data and climate simulations using a data assimilation (DA) technique  
58 has emerged. DA has long been used for forecasting weather and is a well-established  
59 method. However, the DA algorithms used for weather forecasts cannot be directly  
60 applied to paleoclimate due to the different temporal resolution, spatial extent, and type  
61 of information contained within observation data (Widmann et al., 2010). The temporal  
62 resolution and spatial distribution of proxy data are significantly lower (seasonal at best)  
63 and sparser than the present-day observations used for weather forecasts, and the  
64 information we can get does not measure the direct states of climate (e.g., temperature,  
65 wind, pressure, etc.), but represents proxies of those states (e.g., tree-ring width, isotopic  
66 composition in ice sheets, etc.). Thus, DA applied to paleoclimate is only loosely linked  
67 to the methods used in the more mature field of weather forecasting, and it has been  
68 developed almost independently from them.

69 Several DA methods have been proposed for paleoclimate reconstruction (von Storch

70 et al., 2000; van der Schrier et al., 2005; Dirren and Hakim, 2005; Goosse et al., 2006;  
71 Bhend et al., 2012; Dubinkina and Goosse, 2013; Steiger et al., 2014), and paleoclimate  
72 studies using DA have successfully determined the mechanisms behind climate changes  
73 (Crespin et al., 2009; Goosse et al., 2010; 2012; Mathiot et al., 2013). In previous studies,  
74 the variables used for assimilation have been data reconstructed from proxies (e.g.,  
75 surface air temperature) because observation operators or forward models for proxies  
76 have not been readily available. Hereafter, the DA method that assimilates reconstructed  
77 data from proxies is referred to as reconstructed DA. Recently, proxy modelers have  
78 developed and evaluated several forward models (e.g., Dee et al., 2015 and references  
79 therein). Thanks to that, currently a few studies have started attempting to assimilate  
80 proxy data directly (Acevedo et al., 2016; Dee et al., 2016).

81 The main advantage of proxy DA over reconstructed DA is the richness of information  
82 used for assimilation. In previous studies, only a single reconstructed field was  
83 assimilated. However, proxies are influenced by multiple variables. Hence, the  
84 assimilation of a single variable does not use the full information recorded in the proxies.

85 The reconstruction method itself also limits the amount of information. The most  
86 commonly-used climate reconstruction is an empirical and statistical method that relies  
87 on the relationships between climate variables and proxies observed in present-day

88 observations. These relationships are then applied to the past climate proxies to  
89 reconstruct climate prior to the instrumental period. Most of the studies using this  
90 approach assume that the relationship is linear. However, this assumption imposes  
91 considerable limitations in which specific climate proxies can be used, and proxies that  
92 do not satisfy the assumption have generally been omitted (e.g., PAGES 2k Consortium,  
93 2013). Because information on paleoclimate is scarce, it is desirable to use as much  
94 information as possible.

95       Furthermore, the reconstruction method also limits the quality of information  
96 provided. The method also assumes stationarity of the relationship between the climate  
97 and the proxies. However, this assumption has been shown to be invalid for some cases  
98 (e.g., Schmidt et al. 2007; LeGrande and Schmidt, 2009). In the case of reconstructed DA,  
99 the assimilation of such questionable reconstructed data would provide unrealistic results.  
100 In the case of proxy DA; however, the skill of the assimilation is expected to be unchanged,  
101 provided the model can correctly simulate the non-stationarity.

102       The concept of proxy data assimilation is not new, and has been proposed in previous  
103 studies (Hughes and Ammann, 2009; Evans et al., 2013; Yoshimura et al., 2014; Dee et  
104 al., 2015). Yoshimura et al. (2014) demonstrated that the assimilation of the stable water  
105 isotope ratios of vapor improves the analysis for current weather forecasting. They

106 performed an observation system simulation experiment (OSSE) assuming that isotopic  
107 observations from satellites were available every six hours. Because the isotope ratio of  
108 water is one of the most frequently used climate proxies, this represents a significant first  
109 step toward improving the performance of proxy data assimilation in terms of identifying  
110 suitable variables for assimilation. However, it is not yet clear whether it is feasible to  
111 constrain climate only using isotopic proxies whose temporal resolution and spatial  
112 coverage are much longer and sparser than those of the specific study.

113 This study examined the feasibility of isotopic proxy DA for the paleoclimate  
114 reconstruction on the interannual timescale. Because the study represents one of the first  
115 attempts to assimilate isotopic variables on this timescale, we adopted the framework of  
116 an OSSE, as in previous climate data assimilations (Annan and Hargreaves, 2012; Bhend  
117 et al., 2012; Steiger et al., 2014; Acevedo et al., 2016b; Dee et al., 2016). After the  
118 evaluation of proxy DA in the idealized way, we conducted the study with “real” proxy  
119 DA. We investigated which factors decreased or increased the skill of the proxy DA. As  
120 a measure of skill, we report the correlation coefficient throughout the manuscript.

121 In this study, we used only oxygen isotopes ( $^{18}\text{O}$ ) as proxies. The isotope ratio is  
122 expressed in delta notation ( $\delta^{18}\text{O}$ ) relative to Vienna Standard Mean Ocean Water  
123 (VSMOW) throughout the manuscript. If the original data were expressed in delta

124 notation relative to Vienna Pee Dee Belemnite (VPDB), they were converted to the  
125 VSMOW scale.

126 This paper is structured as follows. In the following section, the data assimilation  
127 algorithm, models, data, and experimental design are presented. Section 3 shows the  
128 results of the idealized experiment. Section 4 gives the results of the real proxy DA. The  
129 Discussion is presented in Section 5. Finally, we present our conclusions in Section 6.

130

## 131 **2. Materials and methods**

### 132 **2.1. Data assimilation algorithm**

133 We used a variant of ensemble Kalman filter (EnKF, see Houtekamer and Zhang, 2016,  
134 and references therein); sequential ensemble square root filter (EnSRF; Whitaker and  
135 Hamill, 2002). EnSRF updates the ensemble mean and the anomalies from the ensemble  
136 mean separately, and processes observations serially one at a time if the observations have  
137 independent errors.

138 To assimilate time-averaged data, slight modification was made for the method  
139 following Bhend et al. (2012) and Steiger et al. (2014). In the modified EnSRF, the  
140 analysis procedure is not cycled to the simulation (Bhend et al., 2012); thus, the  
141 background ensembles can be constructed from existing climate model simulations

142 (Huntley and Hakim, 2010; Steiger et al., 2014). As such, we can assimilate data with any  
143 temporal resolution coarser than the model outputs. In this study, we focused on annual  
144 DA.

145 There are two ways to construct the background ensemble in the approach mentioned  
146 above (hereafter offline DA); one using ensemble runs as in weather forecasts (Bhend et  
147 al., 2012; Acevedo et al., 2016) and the other using a single run (Steiger et al., 2014; Dee  
148 et al., 2016). The latter uses the same background ensemble for every analysis step. To  
149 reduce computational cost, we chose the latter way, where the ensemble members are  
150 individual years. This simplification was valid because the interannual variability in a  
151 single run was inherently indistinguishable from the variability in the annual mean within  
152 the ensemble of simulations in which the initial conditions were perturbed, at least for  
153 atmospheric variables. Thus, the background ensembles were the same for all the  
154 reconstruction years and did not contain any year-specific boundary conditions and  
155 forcing information; hence, the background error covariance was constant over time.  
156 Therefore, this study did not consider non-stationarity between the proxies and climate.  
157 Despite the limitations of the algorithm used in this study, it should be noted that the  
158 proxy DA could address non-stationarity if one uses temporally varying background  
159 ensemble. We return to this point in Section 5.



160 To control spurious long-distance correlations due to sampling errors, a localization  
161 function proposed by Gaspari and Cohn (1999) with a scale of 12,000 km was used. The  
162 detailed procedure used for the algorithm is described in Steiger et al. (2014).

163

164

## 165 **2.2. Models**

166 Isotope ratios recorded in ice cores, corals, and tree-ring cellulose were assimilated.  
167 To assimilate these variables, forward models for the variables are required. We used the  
168 forward model developed by Liu et al. (2013; 2014) for corals, and Roden et al. (2000)  
169 for tree-ring cellulose. We assumed that the isotopic composition of ice cores was the  
170 same as that of precipitation at the time of deposition. Note that, in reality, the isotope  
171 ratio recorded in ice cores is not always equal to that in precipitation due to post-  
172 depositional processes (e.g., Schotterer et al., 2004). Because detailed models that  
173 explicitly simulate the impact of all the processes involved in determining the value of  
174 the ratio are not yet available, we used the isotope ratio in precipitation for that in ice  
175 cores to avoid adding unnecessary noise.

176 The isotopic composition in precipitation was simulated using an atmospheric general  
177 circulation model (GCM) into which the isotopic composition of vapor, cloud water, and

178 cloud ice are incorporated as prognostic variables. The model explicitly simulates the  
179 isotopic composition with all the details of the fractionation processes combined with  
180 atmospheric dynamics and thermodynamics, and hydrological cycles. Hence, the model  
181 simulates the isotopic composition consistent with the modeled climate. Although many  
182 such models have been developed previously (Joussaume et al., 1984; Jouzel et al., 1987;  
183 Hoffmann et al., 1998; Noone and Simmonds, 2002; Schmidt et al., 2005; Lee et al., 2007;  
184 Yoshimura et al., 2008; Risi et al., 2010; Werner et al., 2011), we used a newly-developed  
185 model (Okazaki et al., in prep.) based on the atmospheric component of MIROC5  
186 (Watanabe et al. 2010). The spatial resolution was set to T42 (approximately 280 km)  
187 with 40 vertical layers.

188 The variability in  $\delta^{18}\text{O}$  recorded in coral skeleton aragonite ( $\delta^{18}\text{O}_{\text{coral}}$ ) depends on the  
189 calcification temperature and local  $\delta^{18}\text{O}$  in sea water ( $\delta^{18}\text{O}_{\text{sw}}$ ) at the time of growth  
190 (Epstein and Mayeda, 1953). Previous studies have modeled  $\delta^{18}\text{O}_{\text{coral}}$  as the linear  
191 combination of sea surface temperature (SST) and  $\delta^{18}\text{O}_{\text{sw}}$  (e.g., Julliet-Leclerc and  
192 Schmidt, 2001; Brown et al., 2006; Thompson et al., 2011), as follows:

$$193 \quad \delta^{18}\text{O}_{\text{coral}} = \delta^{18}\text{O}_{\text{sw}} + a\text{SST} \quad (1)$$

194 where  $a$  is a constant which represents the slope between  $\delta^{18}\text{O}_{\text{coral}}$  and SST. In this study,  
195 the constant was uniformly set to  $-0.22\text{‰}/^{\circ}\text{C}$  for all the corals, following Thompson et al.

196 (2011), and we used a model developed by Liu et al. (2013; 2014) to predict  $\delta^{18}\text{O}_{\text{sw}}$ . The  
197 model is an isotopic mass balance model that considers evaporation, precipitation, and  
198 mixing with deeper ocean water. The coral model uses the monthly output of the isotope-  
199 enabled GCM as its input, except for the isotope ratio of deeper ocean water, which was  
200 obtained from observation-based gridded data compiled by LeGrande and Schmidt et al.  
201 (2006). After the model calculates the monthly  $\delta^{18}\text{O}_{\text{coral}}$ , it is arithmetically averaged to  
202 provide the annual  $\delta^{18}\text{O}_{\text{coral}}$ .

203 The isotope ratio in tree-ring cellulose ( $\delta^{18}\text{O}_{\text{tree}}$ ) was calculated using a model  
204 developed by Roden et al. (2000). In this model,  $\delta^{18}\text{O}_{\text{tree}}$  is determined by the isotopic  
205 composition of the source water used by trees for photosynthesis, and evaporative  
206 enrichment on leaves via transpiration. In this study, the value of the isotopic composition  
207 in the source water was arbitrarily assumed to be the moving average, traced three-months  
208 backward, of the isotopic composition in precipitation at the site. Again, the model used  
209 the monthly output of the isotope-enabled GCM as its input. After performing the tree-  
210 ring model calculation, the monthly output was weighted using climatological net primary  
211 production (NPP) to calculate the annual average. The NPP data were obtained from the  
212 US National Aeronautics and Space Administration (NASA) Earth Observation website  
213 (<http://neo.sci.gsfc.nasa.gov>).

214 Because the isotopic compositions of the proxies were simulated using the output of  
215 the isotope-enabled GCM, their horizontal resolution was the same as that of the GCM.

216

## 217 **2.3. Experimental design**

### 218 **2.3.1. Control experiment**

219 The first experiment served as a control (CTRL) experiment, and used the framework  
220 of an OSSE. In the experiment, the “simulation” and the “truth” (nature run) were  
221 simulated by the same models, with the same forcing, but with different initial conditions.

222 Because the proxy models were driven by the output of the GCM, the modeled proxies  
223 were consistent with the modeled climate from the GCM. Thus, here we describe the  
224 experimental design for the GCM. The GCM was driven by observed SST and sea-ice  
225 data (HadISST; Rayner et al., 2003), and historical anthropogenic (carbon dioxide,  
226 methane, and ozone) and natural (total solar irradiance) forcing factors. The simulation  
227 covered the period of 1871–2007 (137 years).

228 Although the simulation period included recent times covered by observational data,  
229 we assumed that the only variable that could be obtained was the annual mean of  $\delta^{18}\text{O}$  in  
230 the proxies. We based this assumption on the fact that we wished to perform the DA for a  
231 period in which no direct measurements were available, and there were only climate  
232 proxies covering the period. Therefore, the temporal resolutions of the “observations” and

233 “simulations” were also annual, considering the typical temporal resolution of the proxies.

234 Observations were generated by adding Gaussian noise to the truth. The spatial  
235 distribution of the observations mimicked that of the proxies. The spatial distributions of  
236 each proxy for various periods are mapped in Figure 1. As can be seen from the figure,  
237 the distributions and the number of proxies varied with time. However, for the sake of  
238 simplicity, the distributions of the proxies were assumed to be constant over time in the  
239 CTRL experiment (Figure 1 a). The size of the observation errors will be discussed in  
240 Section 2.4.

241 The state vector consisted of five variables; surface air temperature and amount of  
242 precipitation, as well as the isotopic composition in precipitation, coral, and tree-ring  
243 cellulose. The first three variables were obtained from the isotope-enabled GCM, and the  
244 other two variables were obtained from the proxy models driven by the output of the  
245 GCM.

246

### 247 **2.3.2. Real proxy data assimilation**

248 The second (REAL) experiment assimilated proxy data sampled in the real world. To  
249 mimic realistic conditions, SST and sea-ice concentration data to be used as model forcing  
250 were modified from observational to modeled data. In reality, there were no direct

251 observations available for the target period of the proxy DA. Therefore, to reliably  
252 evaluate the feasibility of proxy DA, the first estimate should be constructed using  
253 modeled SST, as opposed to observed SST. We used SST data from the historical run of  
254 the Coupled Model Intercomparison Project Phase 5 (CMIP5; Taylor et al., 2007) from  
255 the atmosphere-ocean coupled version of MIROC5 (Watanabe et al., 2010) obtained from  
256 the CMIP5 data server (<https://pcmdi.llnl.gov/search/cmip5/>).

257 Because the experiment was not an OSSE, nature run was not necessary.

258

### 259 **2.3.3. Sensitivity experiments**

260 Four sensitivity experiments were conducted to test the robustness of the results of  
261 the proxy DA. In the first sensitivity experiment (CGCM), the simulation run was  
262 constructed from the simulation forced by the modeled SST and sea ice as in the REAL  
263 experiment. The other settings for the simulation run were the same as those in the CTRL  
264 experiment. The nature run was the same as that of the CTRL experiment. Thus, this  
265 experiment investigated how the reconstruction skill of the results was decreased by using  
266 the simulated SST compared to the CTRL.

267 In the second sensitivity experiment (VOBS), the experimental design was the same  
268 as that in the CGCM, except for the number of proxies that were assimilated. In the

269 CGCM experiment, the distribution and number of proxies were set to be constant over  
270 time, as in the CTRL experiment. In the VOBS experiment, the distribution and number  
271 of proxies varied with time. Thus, this experiment investigated how the reconstruction  
272 skill was decreased by changing the number of proxies compared to the CGCM.

273 In the third sensitivity experiment (T2-Assim), reconstructed surface temperature ( $T_r$ )  
274 was assimilated. The purpose of the experiment was to compare the skill of the  
275 reconstructed DA with that of the proxy DA. The experimental design was the same as  
276 that in the CTRL experiment, except for the variables that were assimilated. The  
277 reconstructed temperature was generated with a linear regression model of  $T_r = a +$   
278  $b \times \delta^{18}O$  where  $a$  and  $b$  are coefficients and  $\delta^{18}O$  is the observed isotope ratio. The  
279 coefficients are calibrated with the observed isotope ratio and the true temperature in the  
280 CTRL for the period of 1871 to 1950 (80 years). If the correlation between the isotope  
281 ratio and the temperature during the calibration period was not statistically significant ( $p$   
282  $< 0.10$ ), the data was discarded following Mann et al. (2008). This screening process  
283 reduced the available data from 94 to 81 grid points.

284 The final sensitivity (M08) experiment was used to examine the sensitivity to the  
285 observation network. The experimental design was the same as for the CTRL, except for  
286 the spatial distribution of the proxy. The proxy network used in the experiment was the

287 same as that of Mann et al. (2008). We assumed that isotopic information was available  
288 for all the sites, even when this was not the case. For example, even if only tree-ring width  
289 data were available at some of the sites in Mann et al. (2008), in this experiment we  
290 assumed that isotopic data recorded in tree-ring cellulose were available at the site. The  
291 number of grids containing observations were 94 and 250 for the CTRL experiment and  
292 M08 respectively. The T2-Assim and the M08 were compared with CTRL.

293 The experimental designs are summarized in Table 1.

294

#### 295 **2.4. Observation data**

296 We used paleoclimate data archived at the National Oceanic and Atmospheric  
297 Administration (NOAA; <https://www.ncdc.noaa.gov/data-access/paleoclimatology-data>)  
298 and data used in the PAGES 2k Consortium (2013). Additionally, 22 tree-ring cellulose  
299 and 7 ice core data sets were collected separately from published papers. We only used  
300 oxygen isotopic data ( $^{18}\text{O}$ ) whose temporal resolution was higher than annual; proxies  
301 whose resolution was lower than annual were excluded. The full list of proxies used in  
302 this study is given in the Appendix. Following Crespin et al. (2009) and Goosse et al.  
303 (2010), all proxy records were first normalized, and then averaged onto a T42 grid box to  
304 eliminate model bias and produce a regional grid box composite. To compare the results



305 from each experiment effectively, the assimilated variables were all normalized in both  
306 the simulation and nature runs, and in the observations in all the experiments.

307 Errors were added to the truth in a normalized manner to provide the observation for  
308 all the experiment other than REAL. The normalized error was uniformly set to 0.50 for  
309 all the proxies. This was based on the measurement error of  $\delta^{18}\text{O}$  in ice cores being  
310 reported to range from 0.05 to 0.2‰ (e.g., Rhodes et al., 2012; Takeuchi et al., 2014), and  
311 the corresponding normalized error (measurement error divided by standard deviation of  
312 proxy) then ranges from 0.03 to 0.1, with an average of 0.06. Similarly, the measurement  
313 error of  $\delta^{18}\text{O}$  in coral ranges from 0.03 to 0.11‰ (e.g., Asami et al., 2004; Goodkin et al.,  
314 2008), and the corresponding normalized error ranges from 0.24 to 1.1, with an average  
315 of 0.53. The measurement error of  $\delta^{18}\text{O}$  in tree-ring cellulose ranges from 0.1 to 0.3‰  
316 (e.g., Managave et al, 2011; Young et al, 2015), and the corresponding normalized error  
317 ranges from 0.08 to 0.55, with an average of 0.28. In practice, due to the error of  
318 representativeness and that in observation operator, it is common to increase the  
319 observation errors to ensure that the analysis functions effectively (Yoshimura et al.,  
320 2014). Furthermore, the measurement errors were not always available; therefore, a  
321 uniform value of 0.5 was used for all the proxies. The corresponding signal-to-noise ratio  
322 (SNR) is 2.0. The errors are assumed to be independent for all the experiments.

323

### 324 **3. Results from the OSSE**

325 The time series of the first estimation, the analysis, and the real values for  $\delta^{18}\text{O}$  in  
326 corals are compared as an example in Figure 2 at a location where observational data were  
327 available ( $1^\circ\text{N}$ ,  $157^\circ\text{W}$ ). Because the first estimate was the same for all reconstruction  
328 years, it is drawn as horizontal lines. After the assimilation, the analysis agreed well with  
329 the real values ( $R = 0.96$ ,  $p < 0.001$ ). This confirmed that the assimilation performed well.  
330 We then examined how accurately the other variables were reconstructed by assimilating  
331 isotopic information. Figure 2 also shows the time series of surface air temperature and  
332 precipitation for the same site. There was a clear agreement between the analysis and the  
333 truth for both variables ( $R = 0.92$  and  $0.88$  respectively for temperature and precipitation).  
334 This indicated that temperature and precipitation were effectively reconstructed by  
335 assimilating isotopic variables at this site. This was because the isotope ratio in corals has  
336 a signature not only from temperature as given in Eq. 1, but also precipitation (Liu et al.,  
337 2013); the correlation with  $\delta^{18}\text{O}_{\text{coral}}$  was  $-0.88$  ( $p < 0.001$ ) for both temperature and  
338 precipitation, respectively. This example shows that the isotopic proxy records more than  
339 one variable.

340 Figure 3 maps the correlation coefficients between the analysis and the truth for the

341 isotope ratio, temperature, and precipitation for 1970–1999. Because the first estimate  
342 was constant over time, the temporal correlation between the first estimate and the real  
343 value was zero everywhere. Thus, a positive correlation indicated that the DA improved  
344 the simulation.

345 The correlation for  $\delta^{18}\text{O}$  in precipitation were high at the observation sites, regardless  
346 of the proxy type. This was because  $\delta^{18}\text{O}$  in both corals and trees is affected by the isotopic  
347 composition in precipitated water derived from sea water or soil water. The correlation  
348 for  $\delta^{18}\text{O}$  in tree-ring cellulose were also high at the observation sites. On the other hand,  
349 the high correlation for  $\delta^{18}\text{O}$  in corals were not limited around the observation sites but  
350 were generally high at low- to mid-latitudes. Similarly, the correlation was high at low-  
351 to mid-latitudes for surface temperature. The correlation was also statistically significant  
352 ( $p < 0.05$ ) around the observation sites in high latitude. In contrast, closely correlated  
353 areas were restricted to low-latitude for precipitation.

354 How can the spatial distribution of the correlation pattern be explained; i.e., what do  
355 the proxies represent? To investigate this question, empirical orthogonal function (EOF)  
356 analysis was conducted for the simulated  $\delta^{18}\text{O}$  in precipitation, corals, and tree-ring  
357 cellulose. Only grids that contained observations were included in the analysis. The  
358 variables were centered around their means before the analysis. The data covered the

359 period 1871–2007. The EOF patterns and temporal correlations between surface  
360 temperature and the characteristic evolution of EOF, or the principal components (PCs)  
361 of the first mode of each proxy are shown in Figure 4.

362 The first mode of  $\delta^{18}\text{O}$  in ice core explains 14.3% of the total variance and it is the  
363 only significant mode according to the Rule of Thumb (North et al., 1982) (the first and  
364 the second mode were indistinguishable). The maximum loadings were in Greenland and  
365 Antarctica where temperature increase has been observed for the past hundred years (e.g.  
366 Hartmann et al., 2013). Indeed, the PC1 shows the significant trend and is correlated with  
367 global mean surface temperature ( $R=0.44$ ,  $p < 0.001$ ). Therefore, it is legitimate to regard  
368 ice core data as a proxy of global temperature as revealed from observation (Schneider  
369 and Noone, 2007).

370 The first modes of  $\delta^{18}\text{O}$  in corals, and tree-ring cellulose represent ENSO. The  
371 explained variance of the first modes of  $\delta^{18}\text{O}$  in corals, and tree-ring cellulose was 44.2,  
372 and 19.0%, respectively. The maximum loadings occurred in the central Pacific for corals,  
373 and Tibet for tree-ring cellulose. The temporal correlation between the PC1s and NINO3  
374 index were 0.95, and 0.37 for corals and tree-ring cellulose, respectively. Because the  
375 isotopic composition in corals is influenced by sea temperature, it is expected that the  
376  $\delta^{18}\text{O}$  in corals from the central Pacific records the ENSO signature. Interestingly, the

377 analysis revealed that the  $\delta^{18}\text{O}$  in tree-ring cellulose was also influenced by ENSO; hence,  
378 this proxy contributes to the reconstruction of temperature and precipitation over the  
379 tropical Pacific. Indeed, many previous studies have reported the link between  $\delta^{18}\text{O}$  in  
380 tree-ring cellulose and ENSO (Sano et al. 2012; Xu et al. 2011; 2013; 2015). Xu et al.  
381 (2011) inferred the link is caused by the association between ENSO and Indian monsoon  
382 rainfall (e.g. Rasmusson and Carpenter, 1983). The positive phase of ENSO results in a  
383 decrease in summer monsoon rainfall in India, which leads to dry conditions in summer.  
384 The decrease in precipitation leads to isotopically-enriched precipitation, and the dry  
385 conditions enhance the enrichment of water in leaves. Correspondingly, the  $\delta^{18}\text{O}$  in tree-  
386 ring cellulose becomes heavier than normal in the positive phase of ENSO. Due to the  
387 relationships between the coral and tree-ring cellulose data and ENSO, the correlation  
388 coefficient between the analysis and the truth for the NINO3 index was as high as 0.95 ( $p$   
389  $< 0.001$ ).

390 Although EOF analysis did not reveal any other significant correlation between PCs  
391 and climate indices, climate indices for the North Atlantic Oscillation and Southern  
392 Annular Mode calculated using the reconstructed data were significantly correlated with  
393 the truth (0.59 and 0.46, respectively).

394

395 **4. Real proxy data assimilation**

396 Based on the results of the idealized experiment described in the previous section, we  
397 performed a “real” proxy DA, in which sampled and measured data in the real world were  
398 assimilated.

399 The temporal correlation between the analysis and observations for temperature and  
400 precipitation are shown in Figure 5 (d, h). The observations were obtained from  
401 HadCRUT3 (Brohan et al., 2006) for temperature, and GHCN-Monthly Version 3  
402 (Peterson and Vose, 1997) for precipitation.

403 Although the real proxy DA had reasonable skill, it was inferior relative to the CTRL  
404 experiment. We investigated the cause of the decreased skill using the outputs of the  
405 sensitivity experiments. The design of the experiments was changed in a stepwise fashion  
406 to more realistic conditions of proxy data assimilation from the idealized conditions. The  
407 correlations between the analysis and the truth, or the observation, for the experiments  
408 are shown in Figure 5. The truths for the CGCM and VOBS experiments were the same  
409 as those for the CTRL experiment. The global mean correlation coefficients for  
410 temperature, precipitation, and NINO3 in the experiments are summarized in Figure 6.  
411 Note that the correlation was averaged in the same domain for all the experiments to take  
412 into account the differences in representativeness.

413 In the CGCM experiment, the temporal correlations between the analysis and the truth  
414 were similar to those in the CTRL experiment for both temperature and precipitation  
415 (Figure 5 b, f). This indicates that ENSO and its impacts were well represented in the  
416 modeled SST used to construct the “simulation”. Watanabe et al. (2010) reported similar  
417 modeled SST and observational values for the amplitude of ENSO measured by the  
418 NINO3 index, and the spatial patterns of the temperature and precipitation fields  
419 regressed on the NINO3 time series (see Figures 13 and 14 in their report).

420 Because the number of proxies for assimilation differed from that in the CGCM  
421 experiment, it was not straightforward to compare the results of the REAL experiment  
422 with those of the CGCM experiment. To enable an effective comparison of the results,  
423 the same number of proxies were assimilated in the VOBS experiment as in the REAL  
424 experiment and the same settings were used as in the CGCM experiment for the other  
425 variables. Consequently, the performance of the assimilation of the VOBS experiment  
426 was similar to that of the CGCM experiment for 1970–1999.

427 When the REAL and VOBS experiments were compared, the correlation coefficients  
428 for temperature were significantly decreased over the Indian Ocean, eastern Pacific, and  
429 Atlantic Ocean. These areas corresponded to areas of low reproducibility in the coral  
430 model (Liu et al, 2014). The effects of sea current and river flow in these areas, which

431 were not included in the coral model, were deemed to be considerable. Although we  
432 cannot attribute all the decreased skill to the coral model, the reproducibility of  $\delta^{18}\text{O}$  in  
433 corals in these areas requires improvement to enhance the performance of the assimilation.

434

## 435 **5. Discussion**

### 436 **5.1. Comparison with the reconstructed temperature assimilation**

437 Hughes and Ammann (2009) recommended assimilating measured proxy data, as  
438 opposed to reconstructed data derived from the proxy data. This subsection compares the  
439 results from the CTRL and T2-Assim experiments.

440 Figure 7 shows the spatial distribution of the correlation coefficients for temperature  
441 and precipitation between the truth and the analysis for each experiment. As a whole, the  
442 reconstruction skill was slightly degraded in T2-Assim compared with CTRL with the  
443 global mean correlation coefficients for temperature (precipitation) of 0.50 (0.30), 0.45  
444 (0.23), for CTRL and T2-Assim, respectively. On the other hand, the skill of proxy DA  
445 was not always better than that of T2-Assim (e.g. temperature in tropical Atlantic Ocean).  
446 Those pros and cons can be explained by the difference in the observation error and the  
447 structure of Kalman gain. Figure 8 shows the SNR of the  $T_r$  ranging from 0.22 to 1.6 with  
448 the average of 0.65. Accordingly, the observation error is larger than that of CTRL



449 everywhere, and this resulted in the reduction of the reconstruction skill. On the other  
450 hand, the better skill in T2-Assim should be owing to the difference in Kalman gain. The  
451 Kalman gain determines analysis increments by spreading the information in observations  
452 through the covariance between the prior and the prior-estimated observations. We found  
453 that the correlations between the prior (temperature) and the prior-estimated observation  
454 (temperature and  $\delta^{18}\text{O}$  for T2-Assim and CTRL, respectively) were consistently high in  
455 T2-Assim than in CTRL (not shown) as Dee et al. (2016) showed. Thus, the information  
456 in the observations were more effectively spread to the analysis in T2-Assim, and this  
457 resulted in the improved skill. Note that the screening process hardly hampered the  
458 reconstruction skill, because even if the reconstructed temperature was fully used (i.e. not  
459 screened), the skills were almost the same as T2-Assim.

460 Conducting similar experiments, Dee et al. (2016) also concluded that the  
461 reconstruction skills were almost the same among proxy DA and reconstructed DA if the  
462 relation between the reconstructed variable and the proxy is linear. As isotope-enabled  
463 GCMs (Schmidt et al. 2007; LeGrande and Schmidt. 2009) and observations and models  
464 for tree-rings width (D'Arrigo et al. 2008; Evans et al. 2014; Dee et al., 2016) have  
465 demonstrated, however, the relations between the proxies and climate are non-linear and  
466 non-stationary as well. Thus, it is difficult to expect that the skill of reconstructed DA will

467 be the same as that of proxy DA if we have the well-defined forward proxy models  
468 (Hughes and Ammann, 2009). Although the current models are far from perfect as  
469 implicated in Sect. 4.2, the assimilation of proxy data will offer a useful tool for the  
470 reconstruction of paleoclimate, in which the relationship between the proxies and climate  
471 constructed with the present-day conditions does not apply.

472

## 473 **5.2. Sensitivity to the distribution of the proxies**

474 The skill of the proxy DA was relatively low over Eurasia and North America, even  
475 in the idealized experiment. It was unclear whether this was because of limitations in the  
476 proxy data assimilation or the scant distribution of the proxies. This subsection  
477 investigates the reasons for the relatively low reproducibility in these areas by comparing  
478 the results of the CTRL and M08 experiments, focusing on North America. The number  
479 of grids for which proxy data were available over North America was 11 and 126 for the  
480 CTRL and M08, respectively.

481 The results for North America are shown in Figure 9. The figure shows the temporal  
482 correlation coefficients between the analysis and the truth for surface air temperature and  
483 precipitation. The correlation coefficients were calculated for 1970–1999. The skill was  
484 high in the area in which the proxies were densely distributed for both variables. The

485 values of the coefficients averaged over the United States (30–50°N, 80–120°W) were  
486 0.69 and 0.53 for temperature and precipitation, respectively. Compared to the  
487 coefficients of 0.23 and 0.26, respectively, in the CTRL experiment, the skill was  
488 enhanced for both variables. This implies that the performance of the reconstruction was  
489 strongly dependent on the distribution of the proxy data. Taking into consideration that  
490 proxy DA can assimilate not only proxy data but also reconstructed data, proxy DA can  
491 take advantage of the use of increasingly large amounts of data. Although it is beyond the  
492 scope of this study, the combined use of these data is expected to improve the performance  
493 of proxy DA.

494

## 495 **6. Conclusion and summary**

496 The feasibility of using proxy DA for paleoclimate reconstruction was examined in  
497 both idealized and real conditions experiments. The idealized (CTRL) experiment had  
498 high skill at low latitudes due to the dependency of coral data on temperature and  
499 precipitation in these regions, and the correlation between ENSO and  $\delta^{18}\text{O}$  in corals in  
500 Pacific and tree-ring cellulose in Tibet. Encouraged by the results, real proxy DA was  
501 performed, where the simulation run was constructed from the simulation forced by the  
502 modeled SST, and the real (observed) proxy data were assimilated into the simulation

503 (REAL experiment). The skill of the reconstruction decreased compared to CTRL.

504 To investigate the reason for the relatively low skill in REAL compared to CTRL, we  
505 performed additional experiments; CGCM and VOBS. The imperfect SST used to drive  
506 the CGCM experiment resulted in a slight reduction of the skill compared to the CTRL  
507 experiment with perfect SST. This was because ENSO, which is the most important mode  
508 for the reconstruction, was well represented in the modeled SST. The result is encouraging  
509 because to apply the DA system to reconstruct ages where no instrumental observation is  
510 available, we must rely on SST simulated by coupled GCM. Similarly, assimilating the  
511 unfixed number of the observation only slightly decreased the reconstruction skill as  
512 shown in the comparison between CGCM and VOBS.

513 From the suite of experiments, more than half of the difference between CTRL and  
514 REAL remained unexplained. This remained difference can have a lot of origins: e.g.  
515 errors in the isotope incorporated atmospheric GCM, the proxy models, the proxy data  
516 and so on. The errors in the models include such as model biases and too simplified or  
517 totally lacked model components. For instance, the coral model does not take into account  
518 the impact of ocean current or river runoff in this study. Furthermore, post-depositional  
519 processes for simulating isotope ratio in ice core were not included at all. Those processes  
520 should be included to enable more efficient utilization of all the data. The errors in proxy

521 data include such as misrepresentation of the targeted temporal and/or spatial scales. It is  
522 also possible that the data were highly distorted by non-climatic factors. Thus, a thorough  
523 quality control, similar to the procedures used in weather forecasting, should be  
524 conducted before assimilation (e.g. Appendix B of Compo et al., 2011). At this stage, it  
525 is difficult to show the relative contributions of each factor to the degraded skill in REAL,  
526 it is necessary to estimate the impact of structural errors in models as done in Dee et al.  
527 (2016).

528       Although the skill of proxy DA is dependent on the reproducibility of the models and  
529 the number and quality of the observations, the results suggest that it is feasible to  
530 constrain climate using only proxies. Especially, ENSO and ENSO-related variations in  
531 temperature and precipitation should be reliably reconstructed even with the current  
532 proxy DA system and proxy network used in this study because the correlation coefficient  
533 between the analysis and the observations was as high as 0.83 in the REAL experiment.  
534 Although the reconstruction of ENSO is dependent on data from corals, and the time span  
535 covered by corals is relatively short (a few hundred years), ENSO can still be reliably  
536 reconstructed due to its global impact, as was demonstrated in the relationship between  
537 isotopes in tree-ring cellulose from Tibet.

538       Moreover, we expect that the reproducibility will increase as more proxy data become

539 available because it was heavily dependent on the spatial distribution. Given that proxy  
540 DA can assimilate both proxy data and data reconstructed from proxy, and that the  
541 reconstruction skill in reconstructed DA is partly superior to proxy DA, the combined use  
542 of the two types of data is beneficial for the performance. In that case, care must be taken  
543 not to assimilate dependent information (e.g. proxy data and reconstructed data from the  
544 same proxy).

545       The DA algorithm used in this study did not consider non-stationarity among proxies  
546 and climate variables because the Kalman gain was constant over time. To address non-  
547 stationarity, the Kalman gain for a specific reconstruction year should be constructed for  
548 several tens of years before and after that year. Nevertheless, EnKF can only capture  
549 linear relationships between observations and the modeled state. The use of other  
550 algorithms, such as particle filter (e.g. van Leeuwen, 2009), or four-dimensional  
551 variational assimilation (e.g. Rabier et al., 2000), should be investigated in future studies  
552 for scenarios where non-linearity is not negligible. Thus, it is important in future studies  
553 to investigate non-stationarity and non-linearity among proxies and climate variables to  
554 identify suitable algorithms for proxy DA.

555

## 556 **7. Acknowledgements**

557 The first author was supported by the Japan Society for the Promotion of Science (JSPS)  
558 via a Grant-in-Aid for JSPS Fellows. This study was supported by the Japan Society for  
559 the Promotion of Science Grants 15H01729, 26289160, and 23226012, the SOUSEI  
560 Program, the ArCS project of MEXT, Project S-12 of the Japanese Ministry of the  
561 Environment, and the CREST program of the Japan Science and Technology Agency.  
562

563 **8. References**

- 564 Acevedo, W., Reich, S., and Cubasch, U., Towards the assimilation of tree-ring-width  
565 records using ensemble Kalman filtering techniques, *Clim. Dyn.*, 46, 1909-1920,  
566 2016a.
- 567 Acevedo, W., Fallah, B., Reich, W., and Cubasch, U., Assimilation of pseudo-tree-ring-  
568 width observations into an atmospheric general circulation model, *Clim. Past*  
569 *Discuss.*, 2016.
- 570 Annan, J. D. and Hargreaves, J. C., Identification of climatic state with limited proxy data,  
571 *Clim. Past*, 8, 1141-1151, 2012.
- 572 Asami, R., Yamada, T., Iryu, Y., Meyer, C. P., Quinn, T. M., and Paulay, G., Carbon and  
573 oxygen isotopic composition of a Guam coral and their relationships to  
574 environmental variables in the western Pacific, *Palaeogeogr Palaeocl*, 212, 15, 1-22,  
575 2004.
- 576 Bhend, J., Franke, J., Folini, D., Wild, M., and Brönnimann, S., An ensemble-based  
577 approach to climate reconstructions, *Clim. Past*, 8, 963-976, 2012.
- 578 Brohan, P., Kennedy, J. J., Harris, I., Tett, S. F. B., and Jones, P. D., Uncertainty estimates  
579 in regional and global observed temperature changes: A new data asset from 1850,  
580 *J. Geophys. Res.* 111, D12106, 2006.
- 581 Brown, J., Simmonds, I., and Noone, D., Modeling  $\delta^{18}\text{O}$  in tropical precipitation and the  
582 surface ocean for present-day climate, *J. Geophys. Res.*, 111, D05105, 2006.
- 583 Compo, G. P., Whitaker, J. S., Sardeshmukh, P. D., Matsui, N., Allan, R. J., Yin, X.,  
584 Gleason, B. E, Jr., Vose, R. S., Rutledge, G., Bessemoulin, P., Brönnimann, S.,  
585 Brunet, M., Crouthamel, R. I., Grnt, A. N., Groisman, P. Y., Jones, P. D., Kruk, M.  
586 C., Kruger, A. C., Marshall, G. J., Maugeri, M., Mok, H. Y., Nordli, Ø., Ross, T. F.,  
587 Trigo, R. M., Wang, X. L., Woodruff, S. D., and Worley, S. J., The twentieth Century  
588 Reanalysis Project, *Q. J. Roy. Meteor. Soc.*, 137, 1-28, 2011.
- 589 Crespin, E., Goosse, H., Fichefet, T., and Mann, M., The 15<sup>th</sup> century Arctic warming in  
590 coupled model simulations with data assimilation, *Clim. Past*, 5, 389-401, 2009.
- 591 D'Arrigo, R., Wilson, R., Liepert, B., and Cherubini, P., On the 'Divergence Problem' in  
592 Northern Forests: A review of the the tree-ring evidence and possible causes, *Global*  
593 *Planet. Change*, 60, 289-305, 2008.
- 594 Dee, S., Emile-Geay, J., Evans, M., Allam, A., Steig, E., and Thompson, D., PRYSM: An  
595 open-source framework for PProXY System Modeling, with applications to oxygen-  
596 isotope systems, *Journal of Advances in Modeling Earth Systems*, 7, 1220-1247,  
597 2015.



598 Dee, S., Steiger, N. J., Emile-Geay, J., and Hakim, G. J., On the utility of proxy system  
599 models for estimating climate states over the common era, *Journal of Advances in*  
600 *Modeling Earth Systems*, 8, 1164-1179, 2016.

601 Dirren, S. and Hakim, C., Toward the assimilation of time-averaged observations,  
602 *Geophys. Res. Lett.*, 32, L04804, 2005.

603 Dubinkina, S. and Goosse, H., An assessment of particle filtering methods and nudging  
604 for climate state reconstructions, *Clim. Past*, 9, 1141-1152, 2013.

605 Epstein, S., and Mayeda, T., Variation of O<sup>18</sup> content of waters from natural sources,  
606 *Geochimica Cosmochim. Ac.*, 4, 213-224, 1953.

607 Evans, M. N., Tolwinski-Ward, S. E., Thompson, D. M., and Anchukaitis, K. J.,  
608 Applications of proxy system modeling in high resolution paleoclimatology,  
609 *Quaternary Sci. Rev.*, 76, 16-28, 2013.

610 Evans, M. N., Smerdon, J. E., Kaplan, A., Tolwinski-Ward, S. E., and González-Rouco,  
611 J. F., Climate field reconstruction uncertainty arising from multivariate and  
612 nonlinear properties of predictors, *Geophys. Res. Lett.*, 41,  
613 doi:10.1002/2014GL062063, 2014.

614 Gaspari, G., and Cohn, S., Construction of correlation functions in two and three  
615 dimensions, *Q. J. Roy. Meteor. Soc.*, 125, 723-757, 1999.

616 Goodkin, N. F., Hughen, K. A., Curry, W. B., Doney, S. C., and Ostermann, D. R., Sea  
617 surface temperature and salinity variability at Bermuda during the end of the Little  
618 Ice Age, *Paleoceanography*, 23, PA3203, 2008.

619 Goosse, H., Renssen, H., Timmermann, A., Bradley, R., and Mann, M., Using  
620 paleoclimate proxy-data to select optimal realisations in an ensemble of simulations  
621 of the climate of the past millennium, *Clim. Dyn.*, 27, 165-184, 2006.

622 Goosse, H., Crespin, E., de Montety, A., Mann, M., Renssen, H., and Timmermann, A.,  
623 Reconstructing surface temperature changes over the past 600 years using climate  
624 model simulations with data assimilation, *J. Geophys. Res.*, 115, D09108, 2010.

625 Goosse, H., Crespin, E., Dubinkina, S., Loutre, M., Mann, M., Renssen, H., Sallaz-Damaz,  
626 Y., Shindell, D., The role of forcing and internal dynamics in explaining the  
627 “Medieval Climate Anomaly”, *Clim. Dyn.*, 39, 2847-2866, 2012.

628 Hartmann, D. L., Klein Tank, A. M. G., Rusticucci, M., Alexander, L. V., Brönnimann, S.,  
629 Charabi, F., Dentener, F. J., Dlugokencky, E. J., Easterling, D. R., Kaplan, A., Soden,  
630 B. J., Thorne, P. W., Wild, M., and Zhai, P. M., Observations: Atmosphere and  
631 Surface. In: *Climate Change 2013: The physical science basis. Contribution of*  
632 *Working Group I to the Fifth Assessment Report of the Intergovernmental Panel on*  
633 *Climate Change*, Cambridge University Press, Cambridge, United Kingdom and

634 New York, NY, USA, 2013.

635 Hoffmann, G., Werner, M., Heimann, M., Water isotope module of the ECHAM  
636 atmospheric general circulation model: A study on timescales from days to several  
637 years, *J. Geophys. Res.*, 103, D1427, 16871-16896, 1998.

638 Houtekamer, P. L., and Zhang, F., Review of the ensemble Kalman filter for atmospheric  
639 data assimilation, *Mon. Weather Rev.*, 144, 4489-4532, 2016.

640 Hughes, M., and Ammann, C., The future of the past -an earth system framework for high  
641 resolution paleoclimatology: editorial essay, *Climatic Change*, 94, 247-259, 2009.

642 Huntley, H., and Hakim, G., Assimilation of time-average observations in a quasi-  
643 geostrophic atmospheric jet model, *Clim. Dyn.*, 35, 995-1009, 2010.

644 Joussaume, S., Sadourny, R., and Jouzel, J., A general circulation model of water isotope  
645 cycles in the atmosphere, *Nature*, 311, 24-29, 1984

646 Jouzel, J., Russell, G. L., Suozzo, R. J., Koster, R. D., White, J. W. C., and Broecker, W.  
647 S., Simulations of the HDO and H<sub>2</sub><sup>18</sup>O Atmospheric cycles using the NASA GISS  
648 General Circulation Model: The seasonal cycle for present-day conditions, *J.*  
649 *Geophys. Res.*, 92, D12, 14739-14760, 1987.

650 Julliet-Leclerc, A., and Schmidt, G., A calibration of the oxygen isotope  
651 paleothermometer of coral aragonite from Porites, *Geophys. Res. Lett.*, 28, 21, 4135-  
652 413, 2001.

653 Lee, J.-E., Fung, I., DePaolo, D., and Henning, C., Analysis of the global distribution of  
654 water isotopes using the NCAR atmospheric general circulation model, *J. Geophys.*  
655 *Res.*, 112, D16306, 2007.

656 LeGrande, A., and Schmidt, G., Global gridded data set of the oxygen isotopic  
657 composition in seawater, *Geophys. Res. Lett.*, 33, L12604, 2006.

658 LeGrande, A., and Schmidt, G., Sources of Holocene variability of oxygen isotopes in  
659 paleoclimate archives, *Clim. Past*, 441-455, 2009.

660 Liu, G., Kojima, K., Yoshimura, K., Okai, T., Suzuki, A., Oki, T., Siringan, F., Yoneda, M.,  
661 and Kawahata, H., A model-based test of accuracy of seawater oxygen isotope ratio  
662 record derived from a coral dual proxy method at southeastern Luzon Island, the  
663 Philippines, *J. Geophys. Res.-Biogeo.*, 118, 853-859, 2013.

664 Liu, G., Kojima, K., Yoshimura, K., and Oka, A., Proxy interpretation of coral-recorded  
665 seawater <sup>18</sup>O using 1-D model forced by isotope-incorporated GCM in tropical  
666 oceanic regions, 119, doi: 10.1002/2014JD021583, 2014.

667 Managave, S. R., Sheshshayee, M. S., Ramesh, R., Borgaonkar, H. P., Shad, S. K.,  
668 Bhattacharyya, A., Response of cellulose oxygen isotope values of teak trees in  
669 differing monsoon environments to monsoon rainfall, *Dendrochronologia*, 29, 89-

670 97, 2011.

671 Mann, M., Rutherford, S., Wahl, E., and Ammann, C., Robustness of proxy-based climate  
672 field reconstruction methods, 112, D12109, 2007.

673 Mann, M., Zhang, Z., Hughes, M., Bradley, R., Miller, S., Rutherford, S., Ni, F., Proxy-  
674 based reconstructions of hemispheric and global surface temperature variations over  
675 the past two millennia, *P. Natl. Acad. Sci. USA.*, 105, 13252-13257, 2008.

676 Mathiot, P., Goosse, H., Crosta, X., Stenni, B., Braida, M., Renssen, H., Van Meerbeeck,  
677 C. J., Masson-Delmotte, V., Mairesse, A., and Dubinkina, S., Using data assimilation  
678 to investigate the causes of Southern Hemisphere high latitude cooling from 10 to 8  
679 ka BP, *Clim. Past*, 9, 887-901, 2013.

680 Noone, D. and Simmonds, I., Associations between  $\delta^{18}\text{O}$  of water and climate parameters  
681 in a simulation of atmospheric circulation for 1979-95, *J. Climate*, 15, 3150-3169,  
682 2002.

683 North, G., Bell, T. L., and Cahalan, R. F., Sampling errors in the estimation of empirical  
684 orthogonal functions, *Mon. Weather Rev.*, 110, 699-706, 1982.

685 Okazaki, A., and Yoshimura, K., Development of stable water isotope incorporated  
686 atmosphere-land coupled model MIROC5, in prep.

687 PAGES 2k Consortium, Continental-scale temperature variability during the past two  
688 millennia, *Nat. Geosci.*, 6, 339-346, 2013.

689 Peterson, T. C., and Vose, R. S., An overview of the global historical climatology network  
690 temperature database, *B. Am. Meteorol. Soc.*, 78, 2837-2849, 1997.

691 Rabier, F., Järvinen, H., Klinker, E., Mahfouf, J.-F. and Simmons, A. The ECMWF  
692 operational implementation of four-dimensional variational assimilation. I:  
693 Experimental results with simplified physics. *Q.J.R. Meteorol. Soc.*, 126: 1143–  
694 1170, 2000.

695 Rasmusson, E. M., and Carpenter, T. H., The relationship between eastern Equatorial  
696 Pacific sea surface temperatures and rainfall over India and Sri Lanka, *Mon. Weather  
697 Rev.*, 111, 517-528, 1983.

698 Rayner, N. A., Parker, D. E., Horton, E. B., Folland, C. K., Alexander, L. V., Rowell, D.  
699 P., Kent, E. C., Kaplan, A., Global analyses of sea surface temperature, sea ice, and  
700 night marine air temperature since the late nineteenth century, *J. Geophys. Res.*, 108,  
701 D144407, 2003.

702 Rhodes, R. H., Bertler, N. A. N., Baker, J. A., Steen-Larsen, H. C., Sneed, S. B.,  
703 Morgenstern, U., and Johnsen, S. J., Little Ice Age climate and oceanic conditions  
704 of the Ross Sea, Antarctica from a coastal ice core record, *Clim. Past*, 8, 1223-1238,  
705 2012.

706 Risi, C., Bony, S., Vimeux, F., and Jouzel, J., Water-stable isotopes in the LMDZ4 general  
707 circulation model: Model evaluation for present-day and past climates and  
708 applications to climatic interpretations of tropical isotopic records, *J. Geophys. Res.*,  
709 115, D12118, 2010.

710 Roden, J., Lin, G., and Ehleringer, J., A mechanistic model for interpretation of hydrogen  
711 and oxygen isotope ratios in tree-ring cellulose, *Geochim. Cosmochim. Ac.*, 64, 21-  
712 35, 2000.

713 Sano, M., Xu, C., and Nakatsuka, T., A 300-year Vietnam hydroclimate and ENSO  
714 variability record reconstructed from tree ring  $\delta^{18}\text{O}$ , *J. Geophys. Res.* 117, D12115,  
715 2012.

716 Schmidt, G., Hoffmann, G., Shindell, D., and Hu, Y., Modeling atmospheric stable  
717 isotopes and the potential for constraining cloud processes and stratosphere-  
718 troposphere water exchange, *J. Geophys. Res.*, 110, D21314, 2005.

719 Schmidt, G., LeGrande, A., and Hoffmann, G., Water isotope expressions of intrinsic and  
720 forced variability in coupled ocean-atmosphere model, *J. Geophys. Res.*, 112,  
721 D10103, 2007.

722 Schneider, D. P. and Noone, D. C., Spatial covariance of water isotope records in a global  
723 network of ice cores spanning twentieth-century climate change, *J. Geophys. Res.*,  
724 112, D18105, 2007.

725 Schotterer, U., Stichler, W., Ginot, P., The influence of post-depositional effects on ice  
726 core studies: Examples from the Alps, Andes, and Altai, in *Earth Paleoenvironments:  
727 Records Preserved in Mid- and Low-Latitude Glaciers*, pp.39-59, Kluwer Acad,  
728 Dordrecht, The Netherlands, 2004

729 Steiger, N., Hakim, G., Steig, E., Battisti, D., and Roe, G., Assimilation of Time-Averaged  
730 Pseudoproxies for Climate Reconstruction, 27, 426-441, 2014.

731 Taylor, K. E., Stouffer, R. J., Meehl, G., An overview of CMIP5 and the experiment  
732 design, *B. Am. Meteor. Soc.*, 93, 485-498, 2007.

733 Takeuchi, N., Fujita, K., Aizen, V. B., Narama, C., Yokoyama, Y., Okamoto, S., Naoki,  
734 K., and Kobota, J., The disappearance of glaciers in the Tien Shan Mountains in  
735 Central Asia at the end of Pleistocene, *Quaternary Sci. Rev.*, 103, 26-33, 2014.

736 Thomposon, D. M., Ault, T. R., Evans, M. N., Cole, J. E., and Emile-Geay, J., Comparison  
737 of observed and simulated tropical climate trends using a forward model of coral  
738  $\text{d}^{18}\text{O}$ , *Geophys. Res. Let.*, 38, L14706, 2011.

739 van der Schrier, G. and Barkmeijer, J., Bjerknes' hypothesis on the coldness during  
740 AD1790-1820 revisited, *Clim. Dyn.*, 25, 537-553, 2005.

741 van Leeuwen, P. J., Particle filtering in geophysical systems, *Mon. Weather Rev.*, 137,

742 4089-4114, 2009.

743 von Storch, H., Cubasch, U., Gonzalez-Rouco, J. F., Jones, J. M., Voss, R., Widmann, M.,  
744 and Zorita, E., Combining paleoclimatic evidence and GCMs by means of data  
745 assimilation through upscaling and nudging (DATUN), Proc. 11<sup>th</sup> Symposium on  
746 Global Climate Change Studies, AMS Long Beach, CA, 2000.

747 Watanabe, M., Suzuki, T., O'ishi, R., Komuro, Y., Watanabe, S., Emori, S., Takemura, T.,  
748 Chikira, M., Ogura, T., Sekiguchi, M., Takata, K., Yamazaki, D., Yokohota, T.,  
749 Nozawa, T., Hasumi, H., Tatebe, H., and Kimoto, M., Improved climate simulation  
750 by MIROC5: Mean States, Variability, and Climate Sensitivity, 23, 6312-6335, 2010.

751 Werner, M., Langebroek, P., Carlsen, T., Herold, M., and Lohmann, G., Stable water  
752 isotopes in the ECHAM5 general circulation model: Toward high-resolution isotope  
753 modeling on a global scale, *J. Geophys. Res.*, 116, D15109, 2011.

754 Whitaker, J. S., and Hamill, T. M., Ensemble data assimilation without perturbed  
755 observations, *Mon. Weather Rev.*, 130, 1913-1924, 2002.

756 Widmann, M., Goosse, H., van der Schrier, G., Schnur, R., and Barkmeijer, J., Using data  
757 assimilation to study extratropical Northern Hemisphere climate over the last  
758 millennium, *Clim. Past*, 6, 627-644, 2010.

759 Xu, C., Sano, M., and Nakatsuka, T., Tree ring cellulose  $\delta^{18}\text{O}$  of *Fokienia hodginsii* in  
760 northern Laos: A promising proxy to reconstruct ENSO?, *J. Geophys. Res.* 116,  
761 D245109, 2011.

762 Xu, C., Zheng, H., Nakatsuka, T., and Sano, M., Oxygen isotope signatures preserved in  
763 tree ring cellulose as a proxy for April-September precipitation in Fujian, the  
764 subtropical region of southeast China, *J. Geophys. Res-Atmos.*, 118, 12805-12815,  
765 2013.

766 Xu, C., Pumijumnong, N., Nakatsuka, T., Sano, M., Li, Z., A tree-ring cellulose  $\delta^{18}\text{O}$ -  
767 based July-October precipitation reconstruction since AD 1828, northwest Thailand,  
768 *J. Hydrol.*, 529, 422-441, 2015.

769 Yoshimura, K., Kanamitsu, M., Noone, D., and Oki, T., Historical isotope simulation  
770 using Reanalysis atmospheric data, *J. Geophys. Res.*, 113, D19108, 2008.

771 Yoshimura, K., Miyoshi, T., and Kanamitsu, M., Observation system simulation  
772 experiments using water vapor isotope information, *J. Geophys. Res.*, 119, 7842-  
773 7862, 2014.

774 Young, G. H. F., Loader, N. J., McCarroll, D., Bale, R. J., Demmler, J. C., Miles, D.,  
775 Nayling, N., Rinne, K. T., Robertson, I., Watts, C., and Whitney, M., Oxygen stable  
776 isotope ratios from British oak tree-rings provide a strong and consistent record of  
777 past changes in summer rainfall, *Clim. Dyn.*, 45, 3609-3622, 2015.

778

779

780

**Tables**

781 **Table 1.** Experimental designs. The observation network used in the CTRL experiment is  
 782 denoted as Orig.

|          | SST data to drive<br>simulation run | SST data to<br>drive truth run | Assimilated variable                                     | Observation<br>network | Missing data |
|----------|-------------------------------------|--------------------------------|----------------------------------------------------------|------------------------|--------------|
| CTRL     | HadISST                             | HadISST                        | Simulated $\delta^{18}\text{O}$                          | Orig                   | w/o missing  |
| CGCM     | Modeled SST                         | HadISST                        | Simulated $\delta^{18}\text{O}$                          | Orig                   | w/o missing  |
| VOBS     | Modeled SST                         | HadISST                        | Simulated $\delta^{18}\text{O}$                          | Orig                   | w/ missing   |
| REAL     | Modeled SST                         | -                              | Observed $\delta^{18}\text{O}$                           | Orig                   | w/ missing   |
| T2-Assim | HadISST                             | HadISST                        | Reconstructed T2<br>from simulated $\delta^{18}\text{O}$ | Orig                   | w/o missing  |
| M08      | HadISST                             | HadISST                        | Simulated $\delta^{18}\text{O}$                          | M08                    | w/o missing  |

783

784

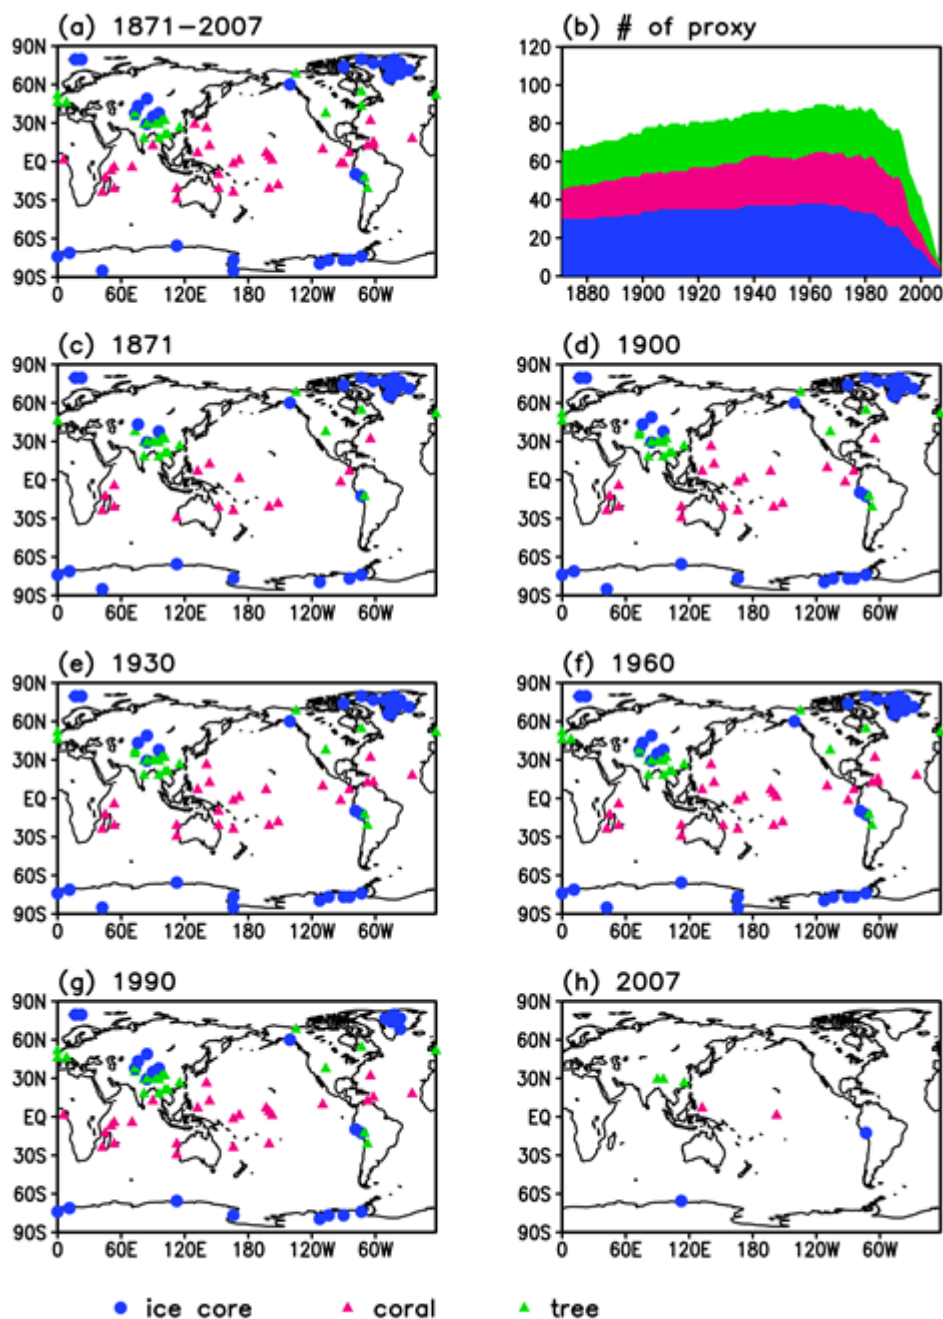

786

787

**Figure 1**

788 Spatial distribution of proxies ( $\delta^{18}\text{O}$  in ice cores, corals, and tree-ring cellulose, denoted  
 789 by blue, pink, and green, respectively). (a) Proxies spanning at least one year during  
 790 1871–2000 are mapped (b) The number of proxies is depicted as a function of time. (c–



791 h) The spatial distributions of the proxies are mapped for (c) 1871, (d) 1900, (e) 1930, (f)  
792 1960, (g) 1990, and (h) 2007.  
793

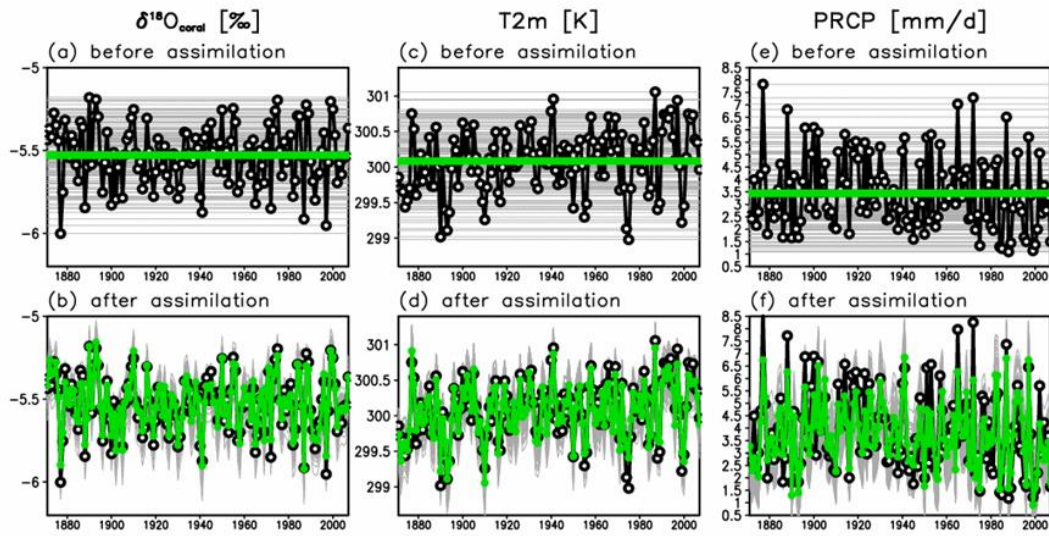

794

795 **Figure 2**

796 Annual mean  $\delta^{18}\text{O}$  in corals at a location where observational data were available ( $1^\circ\text{N}$ ,  
 797  $157^\circ\text{W}$ ) for (a) background and (b) analysis. The black line indicates the truth, gray lines  
 798 indicate ensemble members, and green line indicates the ensemble mean.

799

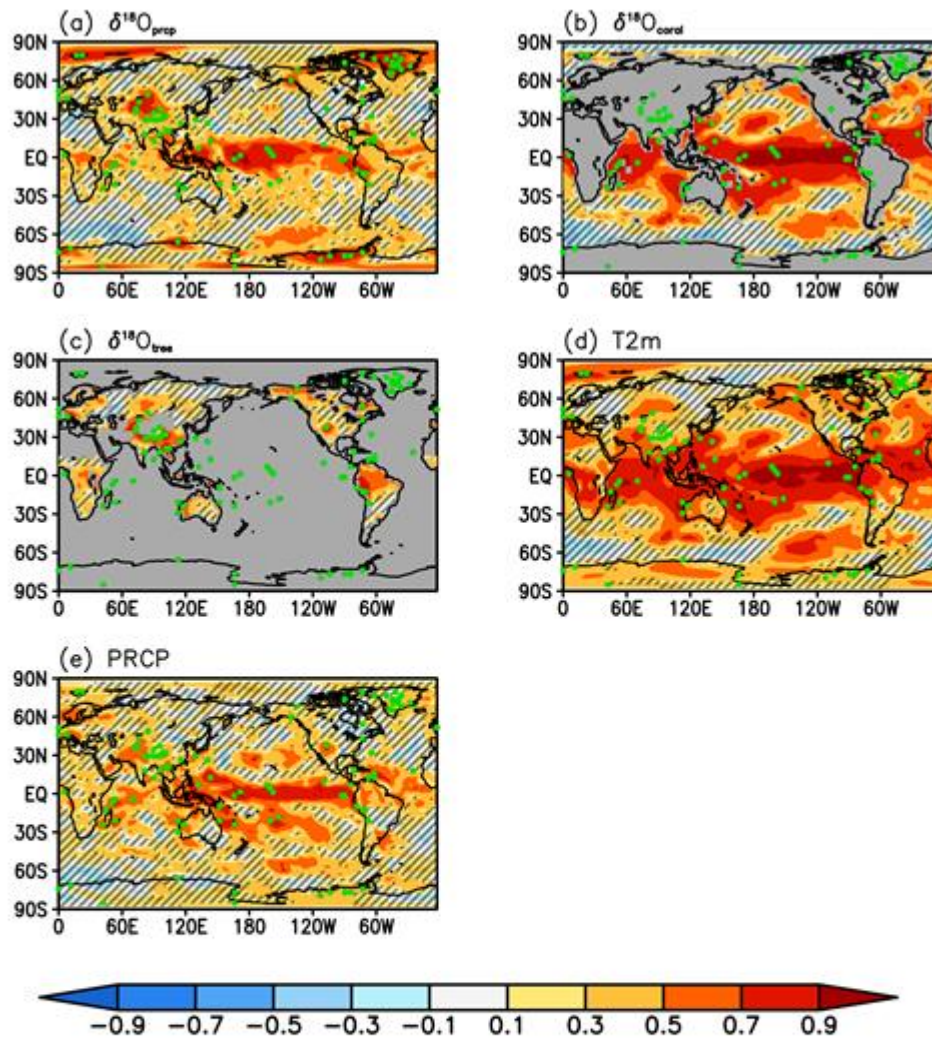

800

801 **Figure 3**

802 Temporal correlation between the analysis and the truth. The green dot represents the  
 803 location of the proxy sampling site. The hatched area indicates where the correlation is  
 804 not statistically significant ( $p > 0.05$ ).

805

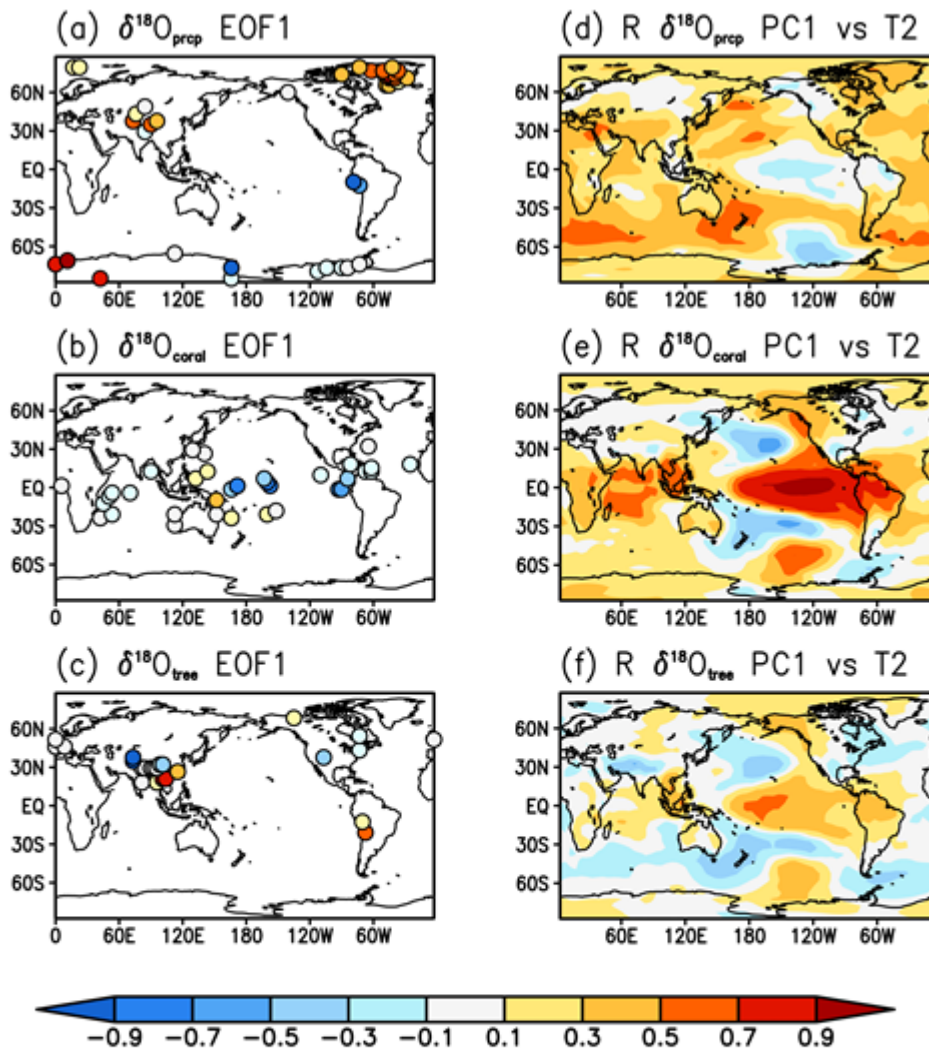

806

807 **Figure 4**

808 First mode of EOF and the correlation between PC1 and temperature for (a and d) ice  
 809 cores, (b and e) corals, and (c and f) tree-ring cellulose.

810

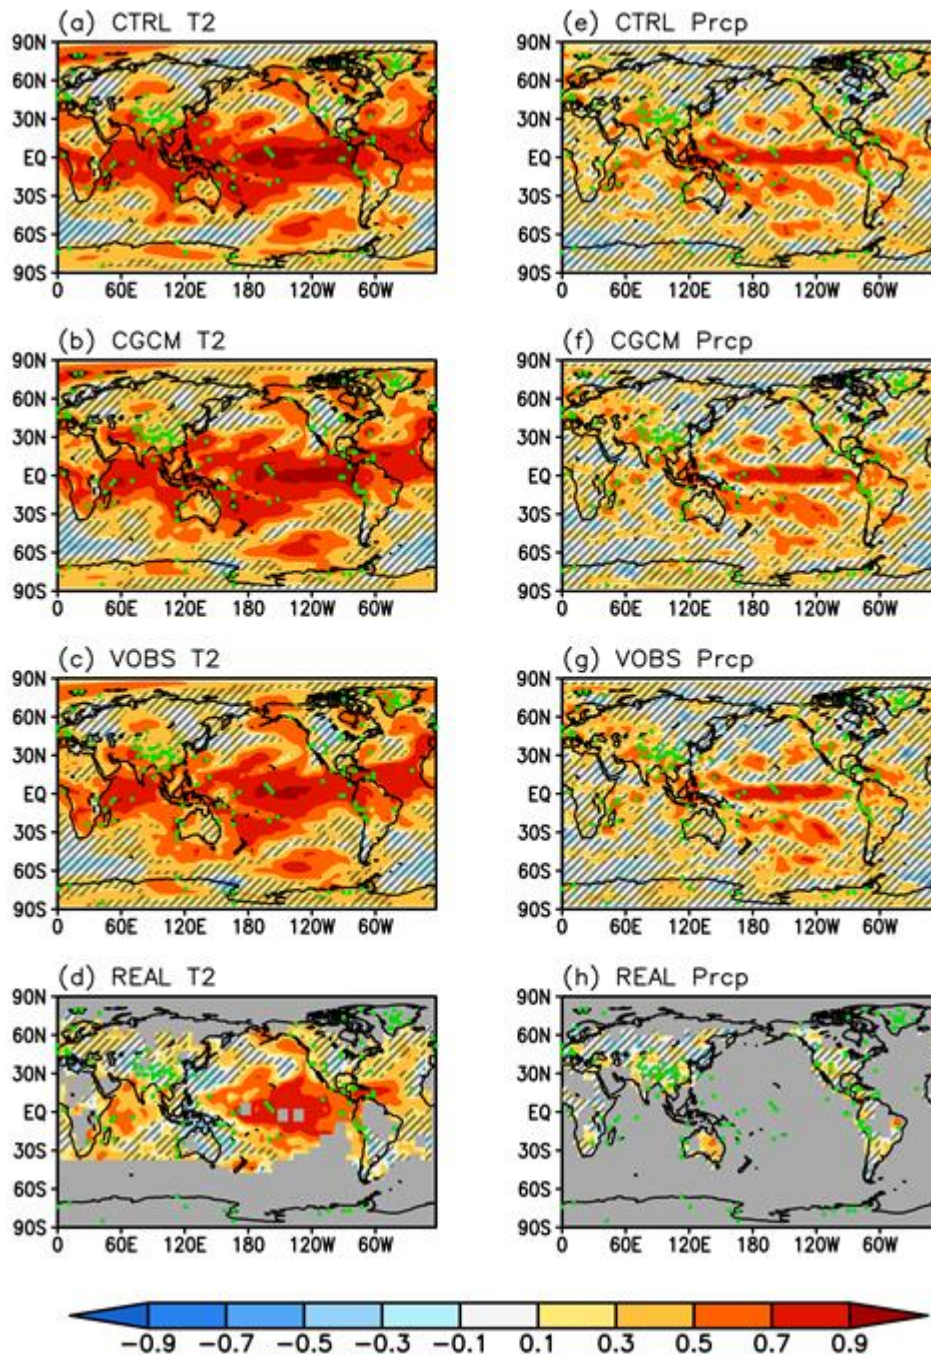

811  
 812  
 813  
 814  
 815  
 816  
 817

**Figure 5**

Temporal correlation between the analysis and the truth for (a–d) temperature and (e–h) precipitation, for each experiment. The green dot represents the location of the proxy sampling site. The hatched area indicates where the correlation is not statistically significant ( $p > 0.05$ ).

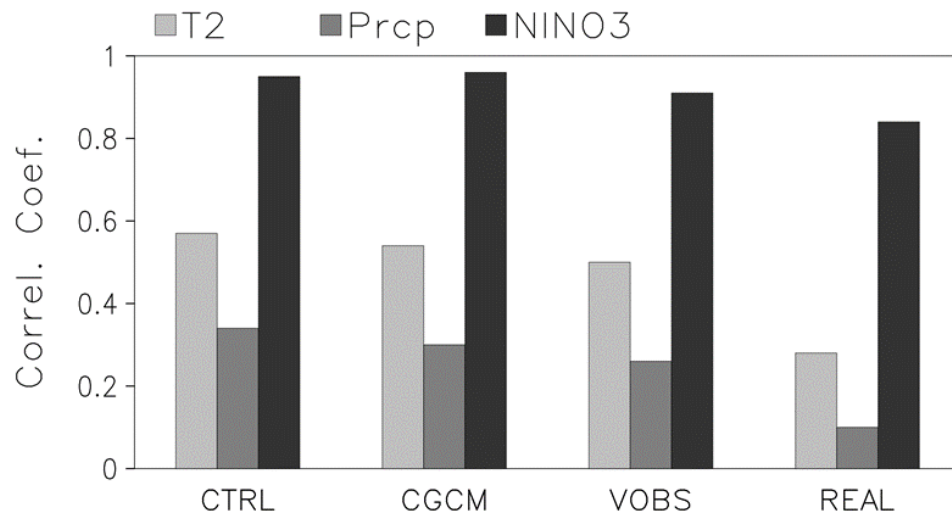

818

819 **Figure 6**

820 Temporal correlation between the analysis and the truth for each experiment for 1970–  
 821 1999. The values for temperature and precipitation are the global mean of the temporal  
 822 correlations.

823

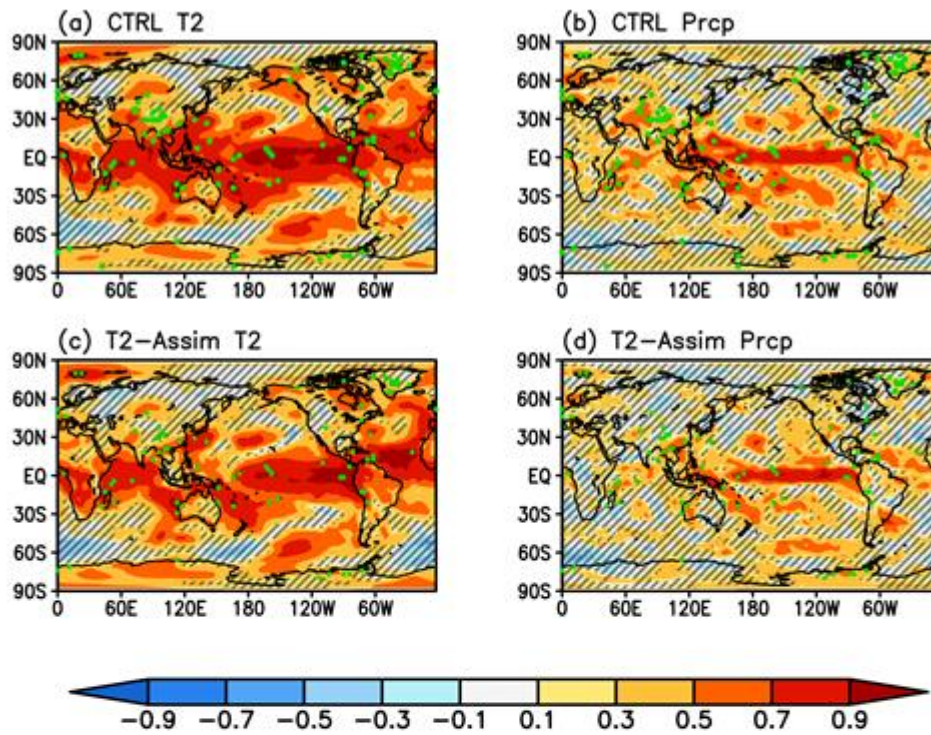

824

825 **Figure 7**

826 Temporal correlations between the analysis and the truth for (a, c) temperature and (b, d)  
 827 precipitation, for (a, b) CTRL and (b, d) T2-Assim. The green dot represents the location  
 828 of the proxy sampling site. The hatched area means that the correlation is not statistically  
 829 significant ( $p > 0.05$ ).

830

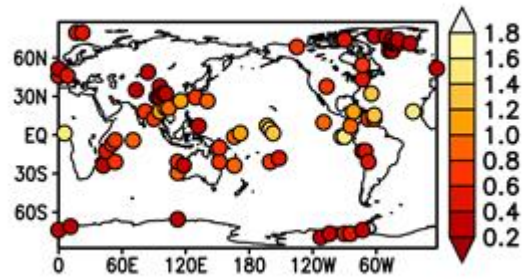

831

832 **Figure 8**

833 Signal to noise ratio (SNR) of the reconstructed temperature from the observation used  
834 in CTRL.

835



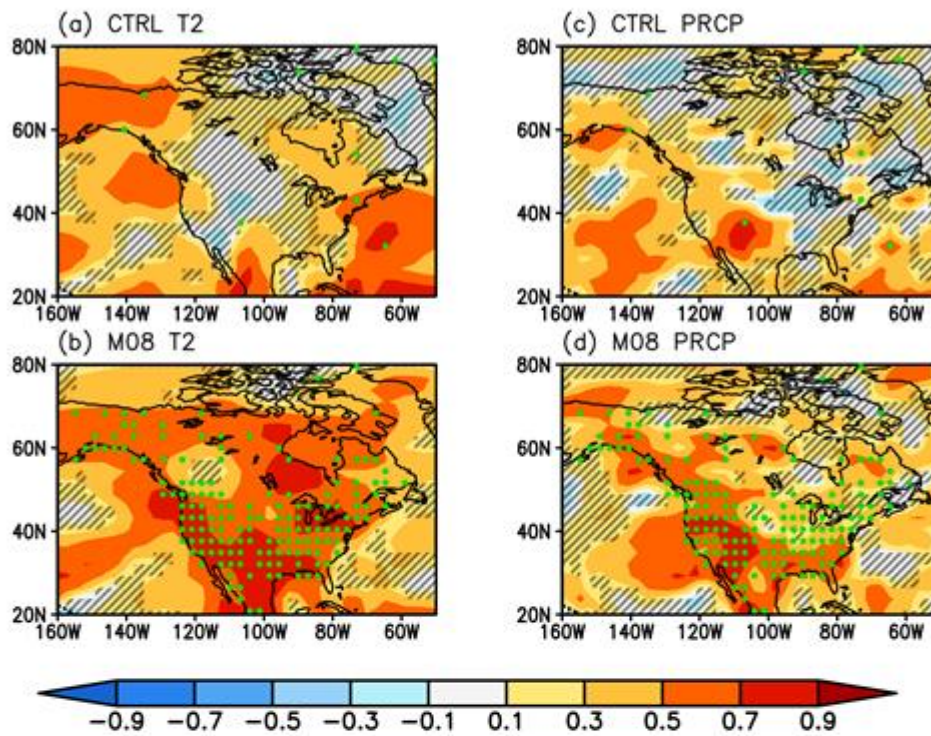

836

837 **Figure 9**

838 Temporal correlations in North America between the analysis and the truth for (a–d)  
 839 temperature, and (e–h) precipitation, for experiments using different proxy networks. The  
 840 green dot represents the location of the proxy sampling site. The hatched area indicates  
 841 where the correlation is not statistically significant ( $p > 0.05$ ).
